# Supplementary material for: Evaluating evasion strategies in zebrafish larvae
Source: PubMed Central journal article supplement — Proc Natl Acad Sci U S A. 2023 Feb 9;120(7):e2218909120. doi: 10.1073/pnas.2218909120 (PMC9962924; doi:10.1073/pnas.2218909120), 2023-02-09
Supplement: pnas.2218909120.sapp.pdf [file pnas.2218909120.sapp.pdf]

1

## 2 **Supplementary Information for**

### 3 **Supplementary Document for: Evaluating Evasion Strategies in Zebrafish larvae**

4 **Yusheng Jiao<sup>1</sup>, Brendan Colvert<sup>2</sup>, Yi Man<sup>1</sup>, Matthew McHenry<sup>3</sup>, Eva Kanso<sup>1\*</sup>**

5 **Eva Kanso**  
6 **E-mail: kanso@usc.edu**

#### 7 **This PDF file includes:**

- 8 Figs. S1 to S17
- 9 Tables S1 to S2
- 10 SI References

---

\*Corresponding Author

**Table S1. List of notation used in the framework to evaluate evasion strategies (top) and in the mechanical model of three-link fish (bottom)**

| variable                                                                  | meaning                                                                                                                    |
|---------------------------------------------------------------------------|----------------------------------------------------------------------------------------------------------------------------|
| $n$                                                                       | dummy variable, index of evasion strategies, $n = 1, 2, 3, 4, 5, 6$                                                        |
| $\theta$                                                                  | response angle, change in prey orientation induced by C-start response                                                     |
| $d$                                                                       | distance between predator and prey at the onset of a C-start evasion                                                       |
| $\phi$                                                                    | angular position of predator in the prey frame of reference                                                                |
| $\psi$                                                                    | predator heading in the prey frame of reference                                                                            |
| $\lambda$                                                                 | deviation between angle of predator heading $\psi$ and its angular position $\phi$                                         |
| $U$                                                                       | prey speed                                                                                                                 |
| $V$                                                                       | predator speed                                                                                                             |
| $\chi$                                                                    | $\chi = \arccos(U/V)$                                                                                                      |
| $\mathbf{s}$                                                              | actual variables of the predator at the onset of (can be any subset of $(\phi, \psi, \lambda)$ ) as measured in experiment |
| $\mathbf{r}$                                                              | actual response of prey (equal to $\theta$ in this work) as measured in experiment                                         |
| $\hat{\mathbf{s}}$                                                        | sensory cues perceived by prey, input to evasion strategy                                                                  |
| $\hat{\mathbf{r}}$                                                        | evasion response intended by prey, output of evasion strategy                                                              |
| $f^{(n)}(\mathbf{s})$                                                     | deterministic form of evasion strategy $n$ that maps sensory cues $\mathbf{s}$ to responder                                |
| $p^{(n)}(\mathbf{s}, \mathbf{r})$                                         | probabilistic form of evasion strategy $n$ , a joint PDF of sensory cues $\mathbf{s}$ and response $\mathbf{r}$            |
| $\sigma \equiv (\sigma_\Phi, \sigma_\Psi, \sigma_\Lambda, \sigma_\Theta)$ | noise parameters for sensing and response variables corresponding to the standard deviation of the von Mises distribution  |

| variable             | meaning                                                                                                                                                        |
|----------------------|----------------------------------------------------------------------------------------------------------------------------------------------------------------|
| $\alpha_1, \alpha_2$ | relative rotation angles of three-link fish, $\alpha_1$ angle between head link and middle link, and $\alpha_2$ angle between middle link and tail link        |
| $\beta$              | orientation of the middle link, $\beta(t) = \beta(0) + \theta$                                                                                                 |
| $m_s$                | mass of each segment in three-link fish                                                                                                                        |
| $J_s$                | moment of inertia of each segment in three-link fish                                                                                                           |
| $m_{1a}$             | added mass of each link in the direction of the major axis                                                                                                     |
| $m_{2a}$             | added mass of each link in the direction of the minor axis                                                                                                     |
| $J_a$                | added moment of inertia of each link                                                                                                                           |
| $m_1$                | total mass of each link in the major axis, $m_1 = m_s + m_{1a}$                                                                                                |
| $m_2$                | total mass of each link in the minor axis, $m_2 = m_s + m_{2a}$                                                                                                |
| $J$                  | total moment of inertia of each link, $J = J_s + J_a$                                                                                                          |
| $(x, y)$             | position of center of three-link fish                                                                                                                          |
| $(v_1, v_2)$         | velocity of center of three-link fish in body-fixed frame $v_1 = \dot{x} \cos \beta + \dot{y} \sin \beta$ and $v_2 = -\dot{x} \sin \beta + \dot{y} \cos \beta$ |

“Everything should be made as simple as possible, but not simpler” –Albert Einstein

## 1. Data Collection and Data Processing Protocols

**A. Experimental set-up.** We consider the experimental data partially published in (1), where zebrafish larvae were exposed to a robotic predator. All zebrafish larvae were bred from wild-type (AB line) colonies in a flow-through tank system (Aquatic Habitats, Apopka, FL, USA) that was maintained at 28.5°C on a 14L:10D cycle. The robotic predator consisted of a sacrificed adult zebrafish controlled to move through an aquarium of otherwise still water through the action of a linear servo-motor (fig. S1A) (1, 2). The motion of the robotic predator was set to a constant speed  $V = 2, 11, 20 \text{ cm s}^{-1}$  to reflect the entire range of speeds of a foraging predator (3). The servo-motor also propelled two high-speed (250 frames  $\text{s}^{-1}$ ) cameras that were mounted above the predator to record the responses of larval zebrafish. The prey were generally motionless until exhibiting a fast start in response to the robot.

**B. Processing of video recordings.** Since the predator was rigid and moved forward at a constant speed in all the experiments, we conveniently defined an inertial frame of reference attached to the rostrum of the predator with the  $x$ -axis along its moving direction (fig. S1B). Based on the kinematic analysis in (1), we obtained for each recorded response, the time of the onset and the end of the prey C-start response  $t_1$  and  $t_2$ , as well as the positions of the rostrum  $\mathbf{x}_{\text{head},1}, \mathbf{x}_{\text{head},2}$  and center of mass  $\mathbf{x}_{\text{com},1}, \mathbf{x}_{\text{com},2}$  of the prey at  $t_1$  and  $t_2$  in the predator frame of reference (fig. S1B). All original measurements are three dimensional. Here, we considered the azimuthal response and projected all kinematic quantities onto the two-dimensional plane where the predator was operated. In Fig. 2 of the main text, we show, relative to the predator frame of reference, the prey position and orientation at  $t_1$  and  $t_2$  for each predator speed,  $V = 2, 11, 20 \text{ cm s}^{-1}$ .

**C. Transformation to prey-centric frame of reference.** We then introduced a prey frame of reference attached to the center of mass of the prey to determine the state of the predator at the onset of evasion in a prey-centric frame (fig. S1C). The predator state at the onset of an evasion event in the prey’s frame of reference consisted of the predator relative distance  $d$ , predator angular position  $\phi$  with respect to the prey heading, the predator heading  $\psi$ , and the deviation  $\lambda$  of the predator heading  $\psi$  from its angular position  $\phi$ ,

$$\begin{aligned} d &= \|\mathbf{x}_{\text{com},1}\|, & \phi &= \arctan2(-\mathbf{x}_{\text{com},1}) - \arctan2(\mathbf{x}_{\text{head},1} - \mathbf{x}_{\text{com},1}), \\ \psi &= -\arctan2(\mathbf{x}_{\text{head},1} - \mathbf{x}_{\text{com},1}), & \lambda &= -\arctan2(\mathbf{x}_{\text{com},1}). \end{aligned} \quad [1]$$

Note that  $(d, \phi)$  represent the polar coordinates of the predator in the prey’s frame of reference.

The prey’s response consisted of the direction of the escape response, here parameterized by the change in orientation  $\theta$  relative to the prey’s initial direction, and the average escape speed  $U$ ,

$$\begin{aligned} \theta &= \arctan2(\mathbf{x}_{\text{head},2} - \mathbf{x}_{\text{com},2}) - \arctan2(\mathbf{x}_{\text{head},1} - \mathbf{x}_{\text{com},1}), \\ U &= \frac{\|\mathbf{x}_{\text{com},2} - \mathbf{x}_{\text{com},1}\|}{t_2 - t_1}. \end{aligned} \quad [2]$$

Note that the orientation of the prey is defined as the direction from the center of mass to the head. In (1), the response angle was defined as the angle  $\arctan2(\mathbf{x}_{\text{com},2} - \mathbf{x}_{\text{com},1}) - \arctan2(\mathbf{x}_{\text{head},1} - \mathbf{x}_{\text{com},1})$  which is the angle that the displacement vector  $(\mathbf{x}_{\text{com},2} - \mathbf{x}_{\text{com},1})$  of the fish center of mass makes during fast start relative to the fish heading  $(\mathbf{x}_{\text{head},1} - \mathbf{x}_{\text{com},1})$  prior to evasion. Here, we define the response angle  $\theta$  as the angle the prey heading direction of the prey makes between pre- and post-evasion.

**D. Statistical analysis.** We separated the experimental data into three sub-datasets based on the predator approaching speed: slow predator ( $V = 2 \text{ cm s}^{-1}$ ), mid-speed predator ( $V = 11 \text{ cm s}^{-1}$ ) and fast predator ( $V = 20 \text{ cm s}^{-1}$ ). The univariate distribution of the predator’s state  $d, \phi, \psi$  and  $\lambda$  at the onset of evasion are displayed in fig. S2(A-D) and the univariate distribution of the prey change in orientation  $\theta$  at evasion are displayed in fig. S2E. Bivariate distributions between  $(\phi, \lambda)$ ,  $(\phi, \theta)$ ,  $(\psi, \theta)$  are shown in Figs. fig. S5–fig. S7.

For the univariate distributions of  $d, \phi, \psi, \lambda$  and  $\theta$  in fig. S2, we calculated the mean and standard deviation (using the Circular Statistic Toolbox in MATLAB for  $\phi, \psi$ , and  $\lambda$  (4)); values reported in the caption of fig. S2 and in table S2. For the bivariate distributions in figs S3–S7, we calculated the correlations between the corresponding two variables and the  $p$ -values. The  $p$ -value indicates the probability that the true correlation coefficient is zero: smaller values of the  $p$ -value indicate higher confidence that a correlation between two (or more) variables exists. Conventionally, people use 0.05 or 0.01 as the threshold, lower  $p$ -values indicate a significant correlation. The correlation coefficient  $\mathcal{C}$  ranges between  $-1$  and  $1$ , indicating the strength of the linear relationship between two variables and whether they are positively or negatively correlated. We also calculated the linear regression between the pairs of variables in figs. S5–S7. For example, in fig. S5, we set  $\theta = c_1\phi + c_2$  and we sought values of  $c_1$  and  $c_2$  that best fit the data. To deal with the inherent periodicity of the variables  $\theta$  and  $\phi$ , we used a customized loss function  $\mathcal{L} = \sum_i [\sin(c_1\phi_i + c_2) - \sin(\theta_i)]^2 + \sum_i [\cos(c_1\phi_i + c_2) - \cos(\theta_i)]^2$ , and we employed a gradient descent approach to solve for the coefficients  $c_1$  and  $c_2$ ; values are reported in the captions of figs S3–S7 and in table S2.

The predator relative distance  $d$  at which the prey was reactive extended up to 55 mm (the prey’s length is about 4 mm) (fig. S2A). However, when plotting the bivariate histograms between the reactive distance  $d$  and prey’s response  $\theta$  (fig. S3), we

62 saw no marked correlation between the two, implying that the prey change in orientation  $\theta$  at evasion is independent of the  
63 reactive distance  $d$ .

64 The predator’s angular position  $\phi$  at the onset of evasion covered all directions between 0 and  $2\pi$  (fig. S2B), indicating that  
65 evasion responses were triggered at any relative angular position of the predator. However, although the prey was randomly  
66 placed in the tank, the angular positions  $\phi$  that triggered evasion were not uniformly distributed: the prey were more alert to  
67 predatory signals approaching from behind, especially at slow predator speed. The prey perception of the predator is influenced  
68 by both vision (5) and flow sensing (2, 3, 6). Vision has a “blind zone” when the predator is approaching behind the prey  
69 ( $\phi \rightarrow 180^\circ$ )(1, 7), but flow sensing can still be triggered. The prey were more responsive as the deviation  $\lambda = \psi - \phi - \pi$  between  
70 the predator heading and angular position increase.

71 When plotting the bivariate histograms between  $\phi$  and  $\lambda$  for which an evasion event is triggered (fig. S4), we observed two  
72 trends. First, both vision and flow sensing seemed to be compromised when the predator is approaching symmetrically behind  
73 the prey at  $\phi = 180^\circ$  and  $\lambda = 0^\circ$ . Second, at slow predator speed, although  $\lambda$  and  $\phi$  are mathematically independent, the  
74 bivariate histogram showed a weak correlation between the predator’s angular position  $\phi$  and relative heading  $\lambda$ . That is, at  
75 slow predator speed, the prey was more likely to escape when the predator is headed towards the front side of prey ( $\lambda > 0$  for  
76  $0^\circ < \phi < 180^\circ$  and  $\lambda < 0$  for  $180^\circ < \phi < 360^\circ$ ), as opposed to when the predator was headed towards the back side of prey.  
77 This correlation got weaker for faster predator. These results suggest that the prey is more likely to initiate an escape response  
78 when it is more strongly stimulated.

79 The distribution of the predator heading direction  $\psi$  at the onset of evasion (fig. S2C) is consistent with these observations:  
80 evasion instances were less likely to be triggered when the predator heading  $\psi$  was close to  $180^\circ$  in magnitude. Importantly,  
81 when plotting the deviation  $\lambda = \psi - \phi - \pi$  of the predator’s heading away from the angular position where it appears in  
82 the prey’s visual field (fig. S2D), we observed that evasion was rarely triggered when  $\lambda$  was close to  $180^\circ$  in magnitude, that  
83 is, when  $\phi \approx \psi$  and the predator was heading away from the prey. Evasion was mostly triggered around  $\lambda = 0$ , for which  
84  $\psi = \phi + \pi$ , when the predator was heading straight towards the prey.

85 To tease out how the prey’s evasion response depends on the predator’s state at evasion, we plotted the bivariate histograms  
86 between  $\phi$  and  $\theta$  (fig. S5), and between  $\psi$  and  $\theta$  (fig. S6A) as well as between  $\lambda$  and  $\theta$  (fig. S6B), for each predator speed and  
87 for the combined dataset. The results in fig. S5 show a linear correlation between  $\theta$  and  $\phi$  with a constant of proportionality  
88 that is approximately equal to 5/9. That is, when  $\phi \rightarrow 0^\circ$ , the prey’s change in heading could be as large as  $100^\circ$ . The change  
89 in heading is mediated by the C-start response of the prey; it is known that at about  $100^\circ$  angle, the efficiency of the C-start  
90 response drops, most likely due to the prey’s mechanical constraints and wake interception (8).

91 Compared to the correlation between  $\theta$  and  $\phi$ , the results in fig. S6 show a weaker correlation between  $\theta$  and  $\psi$ , and  
92 correspondingly, between  $\theta$  and  $\lambda$ , especially at slow predator speed. There is also a large variance in these plots that is not  
93 explained by linear regression. However, when at each predator speed, we separated the data based on whether the stimulus is  
94 sinistral or dextral, that is, based on whether the predator approach heading at the onset of evasion was to the left or to the  
95 right of where it appeared in the predator field of vision (fig. S1C), we found a strong and consistent correlation between  $\theta$  and  
96  $\psi$ , especially at intermediate and fast predator speeds fig. S7.

97 **E. Summary of insights based on statistical analysis.** The statistical analysis in fig. S2–S7 and table S2 leads to the following  
98 general observations:

- 99 • The prey’s change in orientation  $\theta$  at evasion is independent of the reactive distance  $d$  (fig. S3).
- 100 • The prey’s evasion response  $\theta$  correlates linearly with  $\phi$ , consistent with (9) (fig. S5); it also correlates linearly with  $\psi$ ,  
101 especially when the data is arranged based on  $\lambda$  values to distinguish between sinistral and dextral stimuli (fig. S7). In  
102 all cases, the dependence of  $\theta$  on  $\phi$  (fig. S5) and on  $\psi$  (fig. S7) is qualitatively independent of the predator speed.
- 103 • Large reorientation angles  $\theta$  exceeding about  $100^\circ$  occur at lower frequency, independent of the predator state (fig. S2E  
104 and fig. S5–fig. S7).

105 These observations imply that the evasion behavior is independent of  $d$  and that the predator speed  $V$  does not change  
106 qualitatively the trend of how  $\theta$  depends on  $\phi$ ,  $\psi$ ,  $\lambda$ . However, while insightful, these observations do not disambiguate which of  
107 the predator states at evasion  $\phi$ ,  $\psi$ ,  $\lambda$  are most relevant for determining the evasion direction  $\theta$ . To investigate these questions,  
108 we present six theoretical evasion models. In these models, the escape heading depends on one or more of the variables  $\phi$ ,  $\psi$ ,  $\lambda$ ,  
109 whereas  $V$  (or any quantity that depends on  $V$ ) is included as a model parameter. We then develop a probabilistic approach  
110 for comparing the theoretical evasion models to experimental data, as explained in the following sections.

## 111 2. Theoretical Evasion Strategies

112 **A. Evasion Strategies.** We examined six candidate evasion strategies, or mappings from predator state to prey response. Four  
113 strategies are based on existing theories: pure-protean, distance-optimal, parallel, and contralateral. The orthogonal strategy is  
114 postulated based on intuition that the prey should escape in a direction that makes it challenging for the predator to change its  
115 approach course. The antipodal strategy is postulated based on present (fig. S5) and prior experimental observations (9). The  
116 contralateral strategy is also based on empirical observations (1). We described all strategies in a mathematically consistent  
117 manner assuming that, at evasion, the prey turns instantaneously and swims in the direction defined by  $\theta$ , and that the prey  
118 and the predator are point masses equipped with heading directions.

119 **Distance-optimal strategy** According to classic game theory (10), the optimal strategy for the prey is to turn in a direction  
 120 that maximizes its distance of closest approach to the predator. This requires the prey to estimate both the trajectory of the  
 121 predator and its own trajectory after the escape response. Using  $\mathbf{b}_1, \mathbf{b}_2$  to denote the prey-centric frame, the prey estimate of  
 122 its own trajectory  $\mathbf{x}_{\text{prey}}$  and that of the predator  $\mathbf{x}_{\text{predator}}$  are given by

$$\begin{aligned} \mathbf{x}_{\text{prey}} &= Ut \cos \theta \mathbf{b}_1 + Ut \sin \theta \mathbf{b}_2, \\ \mathbf{x}_{\text{predator}} &= (d_o \cos \phi + Vt \cos \psi) \mathbf{b}_1 + (d_o \sin \phi + Vt \sin \psi) \mathbf{b}_2, \end{aligned} \quad [3]$$

124 where  $d_o$  is the distance between predator and prey right before the evasive response, and the respective speeds of the prey and  
 125 predator  $U$  and  $V$  are both assumed to be constant. The estimated distance between predator and prey  $d(t) = \|\mathbf{x}_{\text{prey}} - \mathbf{x}_{\text{predator}}\|$   
 126 is

$$d^2(t) = (d_o \cos \phi + Vt \cos \psi - Ut \cos \theta)^2 + (d_o \sin \phi + Vt \sin \psi - Ut \sin \theta)^2. \quad [4]$$

128 Taking the derivative of  $d^2(t)$  with respect to  $t$  and finding its zero ( $\partial(d^2)/\partial t = 0$ ) yield the time of closest approach

$$t_{\min} = \frac{d_o [U \cos(\theta - \phi) - V \cos(\psi - \phi)]}{U^2 + V^2 - 2UV \cos(\psi - \theta)}. \quad [5]$$

130 We substitute  $t_{\min}$  into Eq. (4) to get the distance of closest approach

$$d_{\min}^2 = \frac{d_o^2 [U \sin(\theta - \phi) - V \sin(\psi - \phi)]^2}{U^2 + V^2 - 2UV \cos(\psi - \theta)}. \quad [6]$$

132 Next, we take the derivative of  $d_{\min}^2$  with respect to  $\theta$  and find its root ( $\partial d_{\min}^2 / \partial \theta = 0$ ) to get the optimal escape angle  $\theta$  that  
 133 maximizes the distance of closest approach for  $V \geq U$  (predator faster than prey) and  $\chi = \cos^{-1}(U/V)$ ,

$$\theta = f^{(1)}(\psi, \lambda; \chi) = \begin{cases} \psi - \chi & \lambda \in (0, \pi) \quad (\text{sinistral stimulus}), \\ \psi + \chi & \lambda \in (-\pi, 0) \quad (\text{dextral stimulus}). \end{cases} \quad [7]$$

135 When  $U > V$  (prey faster than predator), the closest approach happens at  $t_{\min} = 0$  and can be maximized by a range of escape  
 136 angles. In this case we choose  $\chi = 0, \theta = \psi$  to maximize the distance between predator and prey at all  $t > 0$ .

137 Here, the escape direction depends on  $\psi, \lambda$ , and on  $U/V$ , or more precisely on  $\chi = \cos^{-1}(U/V)$ . Note that  $\psi = \phi + \lambda + \pi$ ,  
 138 thus, in our analysis in section 3–4, we treat  $\phi$  and  $\lambda$  as independent variables and  $\chi$  as a parameter.

139 **Orthogonal strategy** If we take the speed ratio to the limit  $U/V \rightarrow 0$  (fast predator), we obtain a strategy where the prey  
 140 orients itself at  $\chi = \pi/2$  from the heading angle of the predator. The predator will want to turn *away* from the predicted  
 141 trajectory of the predator.

$$\theta = f^{(2)}(\psi, \lambda) = \begin{cases} \psi - \frac{\pi}{2}, & \lambda \in (0, \pi) \quad (\text{sinistral stimulus}), \\ \psi + \frac{\pi}{2}, & \lambda \in (-\pi, 0) \quad (\text{dextral stimulus}). \end{cases} \quad [8]$$

143 Here, the escape direction depends on  $\psi$  and  $\lambda$ ; the prey does not need an exact estimate of the relative speed  $U/V$ .

144 **Parallel strategy** A simple strategy in the limit of slow predator  $U/V > 1$  is for the prey to reorient itself along the predator  
 145 heading: the predator is bound to stay behind the prey and never catch it. This strategy is equivalent to the distance-optimal  
 146 strategy for  $\chi = 0$ . That is,

$$\theta = f^{(3)}(\psi) = \psi, \quad [9]$$

148 and the escape direction depends only on  $\psi$ . This strategy has a serious disadvantage compared to other strategies: it could  
 149 place the predator in the prey's blind zone.

**Antipodal strategy** we suggest a strategy in which the prey reorients itself antipodal to the angular position of the predator,  
 consistent with the observations in fig. S5,

$$\theta = f^{(4)}(\phi) = \begin{cases} \phi + \pi, & \phi \in (0, \pi) \quad (\text{left stimulus}) \\ \phi - \pi, & \phi \in (\pi, 2\pi) \quad (\text{right stimulus}). \end{cases} \quad [10]$$

**Contralateral strategy** In (1), the authors suggested that the prey escapes contralateral to the predator when approached from  
 the side. This strategy predicts that the prey turns either 'left' or 'right' by  $\pi/2$  depending on the predator's angular position.

$$\theta = f^{(5)}(\phi) = \begin{cases} -\frac{\pi}{2}, & \phi \in (0, \pi) \quad (\text{left stimulus}), \\ \frac{\pi}{2}, & \phi \in (\pi, 2\pi) \quad (\text{right stimulus}). \end{cases} \quad [11]$$

150 This is the simplest of all deterministic strategies: it requires only knowledge of whether the predator appears to the left or  
 151 right of the prey. Compared to this strategy, the antipodal strategy in Eq. (10) requires the prey to have more precise sensory  
 152 information about the predator's angular position.

153 **Pure-protean strategy** An evasion strategy by which an animal flees in a random direction may be optimal for survival (11):  
 154 the high variability in evasion directions makes it difficult for the predator to anticipate the prey's heading. Mathematically,  
 155 the pure-protean strategy consists of a completely random change in orientation, which requires no precise measurement of the  
 156 predator state. However, the change of orientation  $\theta$  in the experiment (fig. S2E) does not conform to a uniform distribution and  
 157 exhibits strong correlations with the predator angular position  $\phi$  (fig. S5) and heading  $\psi$  (fig. S7). The pure-protean strategy is  
 158 unlikely to be the dominant strategy implemented by larval zebrafish, and we thus eliminate it from further consideration.

### 159 3. Probabilistic Modeling of Evasion

160 To emphasize the generality of the probabilistic approach presented here and in the main document, we write our approach in  
 161 terms of stimulus  $\mathbf{s}$  and response  $\mathbf{r}$ , without specifying a priori the degrees of freedom that they encompass. In the zebrafish  
 162 experiments,  $\mathbf{r} = \{\theta\}$  whereas  $\mathbf{s}$  could include  $\phi, \psi, \lambda$ ;  $d$  is discounted based on the statistical analysis in section 1 and fig. S3,  
 163 and  $V$  is treated separately as a model parameter (see section 7). Theoretically, the vector  $\mathbf{s}$  depends on the evasion model (see  
 164 section 2), and each evasion model can be written as a mapping from stimulus  $\mathbf{s}$  to response  $\mathbf{r}$  of the form

$$165 \quad \mathbf{r} = \mathbf{f}(\mathbf{s}; n) \equiv \mathbf{f}^{(n)}(\mathbf{s}), \quad [12]$$

166 where  $n$  is a dummy index to distinguish between strategies.

167 **A. Probabilistic interpretation of experimental data.** We view the experimental data points  $(\mathbf{s}_i, \mathbf{r}_i)$ ,  $i = 1, \dots, N$ , as sampled  
 168 from a joint probability density function (PDF), denoted  $p_o(\mathbf{s}, \mathbf{r})$ , whose exact form is unknown. An evasion behavior follows a  
 169 conditional probability  $p_o(\mathbf{r}|\mathbf{s})$ , related to the joint probability  $p_o(\mathbf{s}, \mathbf{r})$  via  $p_o(\mathbf{s}, \mathbf{r}) = p_o(\mathbf{r}|\mathbf{s})p_o(\mathbf{s})$ , where  $p_o(\mathbf{s})$  is the distribution  
 170 of stimuli that elicit an escape response (fig. S8A). Only discrete samples of the PDFs  $p_o(\mathbf{s}, \mathbf{r})$  and  $p_o(\mathbf{s})$  are available from  
 171 experiments.

172 It is worth noting that in probability theory, the random variable is often denoted by a capital letter and a realization of the  
 173 random variable is denoted by a lower case letter. For example, the random variable associated with the stimulus vector would  
 174 be  $\mathbf{S}$ , whereas  $\mathbf{s}$  would refer to a specific state occupied by the predator. It is also customary to write the probability density  
 175 function associated with  $\mathbf{S}$  as  $p_{oS}(\mathbf{s})$ . Here, we simplify the notation, with the understanding that, in the mathematical models,  
 176 both  $\mathbf{s}$  and  $\mathbf{r}$  are random variables and  $\mathbf{s}_i$  and  $\mathbf{r}_i$  are realizations.

177 **B. Stimulus and response without and with noise.** We distinguish between the actual predator state  $\mathbf{s}$  and the prey's perception  
 178  $\hat{\mathbf{s}}$  of the predator state. Similarly, we distinguish between the actual escape response  $\mathbf{r}$  and the prey's desired escape response  
 179  $\hat{\mathbf{r}}$ . If the prey's perception and motor response are precise, the stimulus perceived by the prey  $\hat{\mathbf{s}}$  is the same as the actual  
 180 predator state  $\mathbf{s}$  obtained from video recording, and the prey's desired escape response  $\hat{\mathbf{r}}$  is the same as the recorded prey  
 181 escape response  $\mathbf{r}$ . However, the sensorimotor modalities underlying evasion are often noisy: the prey may perceive a noisy  
 182 version  $\hat{\mathbf{s}}$  of the predator's state  $\mathbf{s}$  and its desired response  $\hat{\mathbf{r}}$  may be altered by noisy execution or environmental conditions to  
 183 yield  $\mathbf{r}$ . We treat the two cases, without and with perception and motor/environmental noise, separately (fig. S8B,C),

$$184 \quad \begin{cases} \text{Without noise:} & \hat{\mathbf{s}} = \mathbf{s}, & \hat{\mathbf{r}} = \mathbf{r}, \\ \text{With noise:} & p(\hat{\mathbf{s}}|\mathbf{s}) = \mathcal{S}(\hat{\mathbf{s}}; \mathbf{s}, \boldsymbol{\sigma}_{\mathbf{S}}), & p(\mathbf{r}|\hat{\mathbf{r}}) = \mathcal{R}(\mathbf{r}; \hat{\mathbf{r}}, \boldsymbol{\sigma}_{\mathbf{R}}) \end{cases} \quad [13]$$

185 Here,  $\mathcal{S}$  and  $\mathcal{R}$  denote the probability distribution functions of the noise in sensing/perception and response, parameterized by  
 186 the mean  $\mathbf{s}$  and standard deviation  $\boldsymbol{\sigma}_{\mathbf{S}}$ , and the mean  $\mathbf{r}$  and standard deviation  $\boldsymbol{\sigma}_{\mathbf{R}}$ , respectively. That is, in the perception  
 187 model, we take  $\hat{\mathbf{s}}$  to be normally-distributed around the actual state of the predator  $\mathbf{s}$ , with dispersion  $\boldsymbol{\sigma}_{\mathbf{S}}$ , and in the response  
 188 model, we take  $\mathbf{r}$  to be normally-distributed around the desired response  $\hat{\mathbf{r}}$  of the prey, with dispersion  $\boldsymbol{\sigma}_{\mathbf{R}}$ . For the components  
 189 of  $\mathbf{s}$  and  $\hat{\mathbf{r}}$  that are angles, we use the von Mises distribution (normal distribution on the circle), as discussed in section 4.

190 **C. Conditional probability based on theoretical evasion strategies.** In section 2, each strategy  $n$  defines a desired escape  
 191 response  $\hat{\mathbf{r}}$  given a perceived predatory stimulus  $\hat{\mathbf{s}}$ . An evasion strategy  $n$  can be expressed as a conditional probability using  
 192 the Dirac-delta function

$$193 \quad p^{(n)}(\hat{\mathbf{r}}|\hat{\mathbf{s}}) = \delta(\hat{\mathbf{r}} - \mathbf{f}^{(n)}(\hat{\mathbf{s}})). \quad [14]$$

194 **D. Probabilistic evasion strategies without noise.** In the absence of noise, we have  $\hat{\mathbf{s}} = \mathbf{s}$  and  $\mathbf{r} = \hat{\mathbf{r}}$ . Using the probabilistic  
 195 representation of evasion strategy Eq. (14), the joint probability  $p^{(n)}(\mathbf{s}, \mathbf{r})$  following the theoretical evasion model  $n$  is given by

$$196 \quad p^{(n)}(\mathbf{s}, \mathbf{r}) = p^{(n)}(\mathbf{r} = \hat{\mathbf{r}}|\hat{\mathbf{s}} = \mathbf{s})p_o(\mathbf{s}) = \delta(\mathbf{r} - \mathbf{f}^{(n)}(\mathbf{s}))p_o(\mathbf{s}). \quad [15]$$

197 **E. Probabilistic evasion strategies with noise.** In the presence of perception and response noise, the joint probability  $p^{(n)}(\mathbf{s}, \mathbf{r})$   
 198 following the theoretical evasion model  $n$  is given by the Law of Total Probability (12)

$$199 \quad p^{(n)}(\mathbf{s}, \mathbf{r}) = \iint p(\mathbf{r}|\hat{\mathbf{r}}; \boldsymbol{\sigma}_{\mathbf{R}})p^{(n)}(\hat{\mathbf{r}}|\hat{\mathbf{s}})p(\hat{\mathbf{s}}|\mathbf{s}; \boldsymbol{\sigma}_{\mathbf{S}})p_o(\mathbf{s})d\hat{\mathbf{s}}d\hat{\mathbf{r}}. \quad [16]$$

## 4. Explicit Expressions of Probabilistic Evasion Strategies With Perception and Response Noise

Our goal here is to rewrite the noisy probabilistic evasion model presented in Eq. (16) in component form for each evasion strategy  $n$ .

**A. Perception noise.** The predator's actual state is described by its angular position  $\phi$  relative to the prey and heading  $\psi$  in a prey-centric frame. The deviation angle  $\lambda = \psi - \phi - \pi$  depends on  $\phi$  and  $\psi$ . Alternatively, one could consider  $\phi$  and  $\lambda$  as independent variables, and  $\psi = \lambda + \phi + \pi$  as the dependent variable. This distinction may not be important for the prey, or for how the escape heading depends on these angles, but it is important for how noise is incorporated in the model. Without loss of generality, we chose to apply normally-distributed noise to  $\phi, \lambda$  and let the noise on  $\psi$  follow from  $\psi = \phi + \lambda + \pi$ .

Note that for completeness and to ensure robustness of our results to how noise is incorporated in the model, we also used  $\phi$  and  $\psi$  as the independent variables where noise is applied and calculated the noise on  $\lambda$  from  $\lambda = \psi - \phi - \pi$ . Qualitatively, we arrived at the same conclusions. For simplicity of exposition, we present only the latter case where noise is applied to  $\phi$  and  $\lambda$  for all strategies.

Mediated by the prey's ability to perceive the predator, the noisy estimate of the predator state is denoted as  $\hat{\phi}$  and  $\hat{\lambda}$ . This noisy perception is modeled by the conditional distribution

$$p((\hat{\phi}, \hat{\lambda}) | (\phi, \lambda)) = p(\hat{\phi} | \phi) p(\hat{\lambda} | \lambda), \quad [17]$$

where each state is perceived independently. Specifically, the noise follows the von Mises distributions, which approximates a normal distribution on a circle, centered around the actual state  $\phi$  and  $\lambda$  of the predator,

$$p(\hat{\phi} | \phi) = \frac{1}{2\pi I_0(\sigma_\Phi^{-2})} \exp\left[\frac{\cos(\hat{\phi} - \phi)}{\sigma_\Phi^2}\right], \quad p(\hat{\lambda} | \lambda) = \frac{1}{2\pi I_0(\sigma_\Lambda^{-2})} \exp\left[\frac{\cos(\hat{\lambda} - \lambda)}{\sigma_\Lambda^2}\right]. \quad [18]$$

Here,  $I_0$  is the modified Bessel function of order zero, and  $\sigma_\Phi, \sigma_\Lambda$  are noise parameters representing the dispersion of the von Mises distributions over  $\phi$  and  $\lambda$ .

**B. Response noise.** By means of its motor control and through interaction with the fluid environment, the prey engages in an escape maneuver which is characterized by its actual change in orientation  $\theta$ . The actual escape heading  $\theta$  might be different from the desired escape heading  $\hat{\theta}$  due to motor control or environmental noise. The noise in the underlying biomechanical process and environmental conditions is modeled by the conditional distribution  $p(\theta | \hat{\theta})$ ,

$$p(\theta | \hat{\theta}) = \frac{1}{2\pi I_0(\sigma_\Theta^{-2})} \exp\left[\frac{\cos(\hat{\theta} - \theta)}{\sigma_\Theta^2}\right], \quad [19]$$

where  $I_0$  is the modified Bessel function of order zero, and  $\sigma_\Theta$  represents the dispersion in the actual response  $\theta$  around the desired response  $\hat{\theta}$ .

**C. Conditional probability based on theoretical evasion strategies.** The prey's desired response  $\hat{\theta}$  is modeled as one of several strategies described by the conditional distribution introduced in Eq. (15) and expressed here in component form

$$p^{(n)}(\hat{\theta} | (\hat{\phi}, \hat{\lambda})) = \delta(\hat{\theta} - f^{(n)}(\hat{\phi}, \hat{\lambda})). \quad [20]$$

**Distance-optimal strategy conditional probability** We rewrite Eq. (20) for the distance-optimal strategy described in Eq. (7). The desired escape heading  $\hat{\theta}$  depends on the perceived heading of the predator  $\hat{\psi}$  and perceived deviation  $\hat{\lambda} = \hat{\psi} - \hat{\phi} - \pi$  between  $\hat{\psi}$  and perceived angular position  $\hat{\phi}$ . The conditional probability distribution associated with Eq. (7) is given by

$$p^{(1)}(\hat{\theta} | (\hat{\psi}, \hat{\lambda}); \chi) = \delta(\hat{\theta} - \hat{\psi} + \chi) \text{rect}_{(0, \pi)}(\hat{\lambda}) + \delta(\hat{\theta} - \hat{\psi} - \chi) \text{rect}_{(-\pi, 0)}(\hat{\lambda}), \quad [21]$$

where  $\delta(\cdot)$  is the Dirac delta function and  $\text{rect}_{(a, b)}(\cdot)$  is the rectangular window function, equal to 1 between  $a$  and  $b$  and 0 otherwise.

**Orthogonal strategy conditional probability** The conditional probability distribution describing the orthogonal strategy in Eq. (8) is given by

$$p^{(2)}(\hat{\theta} | (\hat{\psi}, \hat{\lambda})) = \delta\left(\hat{\theta} - \hat{\psi} + \frac{\pi}{2}\right) \text{rect}_{(0, \pi)}(\hat{\lambda}) + \delta\left(\hat{\theta} - \hat{\psi} - \frac{\pi}{2}\right) \text{rect}_{(-\pi, 0)}(\hat{\lambda}). \quad [22]$$

**Parallel strategy conditional probability** The conditional probability distribution describing the parallel strategy in Eq. (9) is given by

$$p^{(3)}(\hat{\theta} | \hat{\psi}) = \delta(\hat{\theta} - \hat{\psi}). \quad [23]$$

**Antipodal strategy conditional probability** According to Eq. (10), the conditional probability distribution describing the antipodal strategy is given by

$$p^{(4)}(\hat{\theta} | \hat{\phi}) = \delta(\hat{\theta} - \hat{\phi} - \pi) \text{rect}_{(0, \pi)}(\hat{\phi}) + \delta(\hat{\theta} - \hat{\phi} + \pi) \text{rect}_{(\pi, 2\pi)}(\hat{\phi})$$

Using the periodicity condition  $\phi + 2\pi \rightarrow \phi$ , we get that

$$p^{(4)}(\hat{\theta} | \hat{\phi}) = \delta(\hat{\theta} - \hat{\phi} - \pi) \quad [24]$$



**Contralateral strategy conditional probability** According to Eq. (11), the conditional probability distribution associated with the contralateral strategy is

$$p^{(5)}(\hat{\theta}|\hat{\phi}) = \delta\left(\hat{\theta} + \frac{\pi}{2}\right) \text{rect}_{(0,\pi)}(\hat{\phi}) + \delta\left(\hat{\theta} - \frac{\pi}{2}\right) \text{rect}_{(\pi,2\pi)}(\hat{\phi}). \quad [25]$$

**D. Probabilistic evasion models with perception and response noise.** Using the Law of Total Probability (12), we rewrite Eq. (16) in component form and perform the cascading operations

$$p^{(n)}(\theta|(\phi, \lambda)) = \iiint p(\theta|\hat{\theta})p^{(n)}(\hat{\theta}|\hat{\phi}, \hat{\lambda})p(\hat{\phi}, \hat{\lambda}|(\phi, \lambda))d\hat{\theta}d\hat{\phi}d\hat{\lambda}. \quad [26]$$

Given  $p(\theta|(\phi, \lambda))$  and using the definition of conditional probability, the joint distribution of predator state and prey response can be computed using

$$p^{(n)}(\theta, \phi, \lambda) = p^{(n)}(\theta|(\phi, \lambda))p_o(\phi, \lambda). \quad [27]$$

The joint distribution  $p^{(n)}(\theta, \phi, \lambda)$  forms a *probabilistic model* with perception and response noise that can then be compared to measured experimental data.

In the following, we derive the conditional distribution  $p^{(n)}(\theta|(\phi, \lambda))$  in Eq. (26) for each of the five strategies.

**Distance-optimal strategy with perception and response noise** Substitute  $\hat{\psi} = \hat{\lambda} + \hat{\phi} + \pi$  into Eq. (21) to obtain the conditional probability based on the distance-optimal strategy

$$p^{(1)}(\hat{\theta}|\hat{\phi}, \hat{\lambda}) = \delta(\hat{\theta} - \hat{\lambda} - \hat{\phi} - \pi + \chi) \text{rect}_{(0,\pi)}(\hat{\lambda}) + \delta(\hat{\theta} - \hat{\lambda} - \hat{\phi} - \pi - \chi) \text{rect}_{(-\pi,0)}(\hat{\lambda}). \quad [28]$$

Now, substitute Eq. (28), Eq. (18) and Eq. (19) into Eq. (26) and simplify the resulting integrals to arrive at

$$p^{(1)}(\theta|(\phi, \lambda)) = \frac{1}{8\pi^3 I_0(\sigma_\Lambda^{-2}) I_0(\sigma_\Phi^{-2}) I_0(\sigma_\Theta^{-2})} \left[ \int_0^{2\pi} \int_0^\pi \exp\left(\frac{\cos(\hat{\theta} - \theta)}{\sigma_\Theta^2} + \frac{\cos(\hat{\lambda} - \lambda)}{\sigma_\Lambda^2} + \frac{\cos(\hat{\theta} - \hat{\lambda} - \pi + \chi - \phi)}{\sigma_\Phi^2}\right) d\hat{\lambda}d\hat{\theta} \right. \\ \left. + \int_0^{2\pi} \int_{-\pi}^0 \exp\left(\frac{\cos(\hat{\theta} - \theta)}{\sigma_\Theta^2} + \frac{\cos(\hat{\lambda} - \lambda)}{\sigma_\Lambda^2} + \frac{\cos(\hat{\theta} - \hat{\lambda} - \pi - \chi - \phi)}{\sigma_\Phi^2}\right) d\hat{\lambda}d\hat{\theta} \right]. \quad [29]$$

**Orthogonal strategy with perception and response noise** The computation is similar to that of the distance-optimal strategy, with  $\chi = \cos^{-1}(U/V) = \pi/2$ . We get

$$p^{(2)}(\theta|(\phi, \lambda)) = \frac{1}{8\pi^3 I_0(\sigma_\Lambda^{-2}) I_0(\sigma_\Phi^{-2}) I_0(\sigma_\Theta^{-2})} \left[ \int_0^{2\pi} \int_0^\pi \exp\left(\frac{\cos(\hat{\theta} - \theta)}{\sigma_\Theta^2} + \frac{\cos(\hat{\lambda} - \lambda)}{\sigma_\Lambda^2} + \frac{\cos(\hat{\theta} - \hat{\lambda} - \frac{\pi}{2} - \phi)}{\sigma_\Phi^2}\right) d\hat{\lambda}d\hat{\theta} \right. \\ \left. + \int_0^{2\pi} \int_{-\pi}^0 \exp\left(\frac{\cos(\hat{\theta} - \theta)}{\sigma_\Theta^2} + \frac{\cos(\hat{\lambda} - \lambda)}{\sigma_\Lambda^2} + \frac{\cos(\hat{\theta} - \hat{\lambda} - \frac{3\pi}{2} - \phi)}{\sigma_\Phi^2}\right) d\hat{\lambda}d\hat{\theta} \right]. \quad [30]$$

**Parallel strategy with perception and response noise** Here also we have a similar computation with  $\chi = \cos^{-1}(U/V) = 0$ ,

$$p^{(3)}(\theta|(\phi, \lambda)) = \frac{1}{8\pi^3 I_0(\sigma_\Lambda^{-2}) I_0(\sigma_\Phi^{-2}) I_0(\sigma_\Theta^{-2})} \int_0^{2\pi} \int_{-\pi}^\pi \exp\left(\frac{\cos(\hat{\theta} - \theta)}{\sigma_\Theta^2} + \frac{\cos(\hat{\lambda} - \lambda)}{\sigma_\Lambda^2} + \frac{\cos(\hat{\theta} - \hat{\lambda} - \pi - \phi)}{\sigma_\Phi^2}\right) d\hat{\lambda}d\hat{\theta}. \quad [31]$$

**Antipodal strategy with perception and response noise** Substitute Eq. (18), Eq. (19) and Eq. (24) into Eq. (26) and simplify the resulting integrals to arrive at

$$p^{(4)}(\theta|\phi) = \frac{1}{4\pi^2 I_0(\sigma_\Phi^{-2}) I_0(\sigma_\Theta^{-2})} \int_0^{2\pi} \exp\left(\frac{\cos(\hat{\theta} + \pi - \phi)}{\sigma_\Phi^2} + \frac{\cos(\hat{\theta} - \theta)}{\sigma_\Theta^2}\right) d\hat{\theta}. \quad [32]$$

**Contralateral strategy with perception and response noise** Substitute Eq. (18), Eq. (19) and Eq. (25) into Eq. (26) and simplify the resulting integrals to arrive at

$$p^{(5)}(\theta|\phi) = \frac{1}{2\pi I_0(\sigma_\Theta^{-2})} \left[ \exp\left(\frac{\cos(\theta + \frac{\pi}{2})}{\sigma_\Theta^2}\right) \xi(\phi) + \exp\left(\frac{\cos(\theta - \frac{\pi}{2})}{\sigma_\Theta^2}\right) (1 - \xi(\phi)) \right], \quad [33]$$

where

$$\xi(\phi) = \frac{1}{2\pi I_0(\sigma_\Phi^{-2})} \int_0^\pi \exp\left(\frac{\cos(\hat{\phi} - \phi)}{\sigma_\Phi^2}\right) d\hat{\phi}. \quad [34]$$

**E. Interpretation of noisy strategies in the limit of large noise parameters.** The noise parameters  $\sigma_\phi, \sigma_\lambda, \sigma_\theta$  in our probabilistic models act approximately as the standard deviations for the von Mises distributions, whereas mean values of the perception noise are determined from experimental measurements of the predator state and mean values of response noise are based on the evasion strategies  $\hat{\theta} = f^{(n)}(\hat{\phi}, \hat{\psi}, \hat{\lambda})$ . To interpret our probabilistic models, it is important to first understand the limiting behavior of a von Mises distribution: when noise is zero, the von Mises distribution converges to a Dirac-delta function at the mean value; when the noise level is high, the distribution resembles a circular uniform distribution, where the PDF becomes  $1/(2\pi)$  everywhere.



264 **Limit of small perception and response noise** At zero or small noise  $\sigma_\Theta, \sigma_\Phi, \sigma_\Lambda \rightarrow 0$ , the probabilistic models in Eqs. (29)–(33)  
 265 behave similar to their deterministic counterparts in Eqs. (21)–(25) and predict any prey response other than  $\hat{\mathbf{r}} = \mathbf{r} = f^{(n)}(\hat{\mathbf{s}} = \mathbf{s})$   
 266 with probability almost 0.

267 **Limit of large response noise** When the response noise is large  $\sigma_\Theta \rightarrow \infty$ , the probabilistic models predict any prey response with  
 268 equal probability  $1/(2\pi)$ , irrespective of the strategy or the perception noise, thus all strategies become essentially equivalent  
 269 to the pure-protean strategy.

270 **Limit of large perception noise** Consider no response noise,  $\sigma_\Theta = 0$ . Depending on the specific strategy, the two perception  
 271 noise parameters  $\sigma_\Phi$  and  $\sigma_\Lambda$  play different roles. For the contralateral strategy, high level of noise in predator angular position  
 272  $\phi$  leads to equal probability of 0.5 in predicting  $\pm\pi/2$ , that is, the probabilistic model becomes that of a ‘split’ pure-protean  
 273 strategy with equal probability of turning  $90^\circ$  to the left or right of the prey. For the other four models, large noise in predator  
 274 heading  $\sigma_\Phi$  works equivalently to the response noise  $\sigma_\Theta$ , due to the symmetry in Eqs. (29)–(32); that is, in the limit of large  
 275 perception noise  $\sigma_\Phi \rightarrow \infty$ , all four strategies become essentially equivalent to the pure-protean strategy.

276 Now assume that the perception noise in  $\phi$  is negligible  $\sigma_\Phi \rightarrow 0$ , but the perception noise in  $\lambda$  can be large  $\sigma_\Lambda \rightarrow \infty$ . Since  
 277 the antipodal and contralateral strategies are independent of  $\lambda$ , their behavior remains the same as that of their deterministic  
 278 counterparts. For the distance-optimal strategy with  $\chi > 0$ , the noise in predator heading deviation  $\sigma_\Lambda$  itself does not lead  
 279 to a pure-protean strategy, no matter how large it gets. Assuming zero noise in  $\phi = \hat{\phi}$  and  $\theta = \hat{\theta}$  and infinite noise in  $\lambda$ , the  
 280 probability of any  $\hat{\lambda}$  is equal to  $1/(2\pi)$ . Now, given a particular value of  $\phi$  and considering the perceived stimulus is sinistral  
 281  $\hat{\lambda} > 0$ , according to Eq. (7), the evasion direction  $\theta$  would lie in the range  $[\phi + \pi - \chi, \phi + 2\pi - \chi]$  with a probability  $1/\pi$ .  
 282 The probability of an escape direction in the complementary half-plane is zero. This is clearly illustrated in fig. S9A for the  
 283 example case  $\phi = \pi/2$ . Similarly, given a particular value of  $\phi$  and considering the perceived stimulus is dextral  $\hat{\lambda} < 0$ , the  
 284 evasion direction  $\theta$  would lie in the range  $[\phi + \chi, \phi + \pi + \chi]$  with a probability  $1/\pi$ , as illustrated in fig. S9B. That is, the  
 285 corresponding PDF gives twice the probability than average for the range of angles  $[\phi + \pi - \chi, \phi + \pi + \chi]$  centered around the  
 286 opposite direction of the predator angular position ( $\phi + \pi$ ), and zero probability for the range of angles  $[\phi - \chi, \phi + \chi]$  centered  
 287 around the predator position; see fig. S9C. That is, for a uniformly-distributed  $\hat{\lambda}$ , the PDF associated with the distance-optimal  
 288 strategy is given by

$$289 \quad p(\theta \in [\phi + \pi - \chi, \phi + \pi + \chi]) = \frac{1}{\pi}, \quad p(\theta \in [\phi - \chi, \phi + \chi]) = 0, \quad p(\theta \in [\phi + \chi, \phi + \pi - \chi] \cup [\phi + \pi + \chi, \phi - \chi]) = \frac{1}{2\pi}. \quad [35]$$

290 Note that both the range of angles for which the probability is zero and the range of angles for which the probability is  $1/\pi$   
 291 span a sector of  $2\chi$ . For the orthogonal strategy  $\chi = \pi/2$ , the PDF gives probability of  $1/\pi$  on the half-plane opposite to the  
 292 predator position and zero probability on the half-plane on the same side as the predator. Mathematically, the orthogonal  
 293 strategy with large noise on  $\lambda$  converges to the antipodal strategy with uniform noise spanning a range of  $\pi$  on either  $\phi$  or  $\theta$ .

## 294 5. Evaluation of Probabilistic Evasion Models with No Perception and Response Noise

295 **A. Theoretical predictions without noise.** The joint probability  $p^{(n)}(\mathbf{s}, \mathbf{r})$  of following strategy  $n$  is given by Eq. (15) in the  
 296 absence of perception and response noise. To obtain predictions of the evasion response given the recorded predatory stimuli, we  
 297 use as input the distribution of the empirically-observed stimuli  $\mathbf{s}_i$ , and we construct a dataset  $(\mathbf{s}_i, \mathbf{r}_i^{(n)})$ , where  $\mathbf{r}_i^{(n)} = \mathbf{f}^{(n)}(\mathbf{s}_i)$ ,  
 298 for each strategy. Each dataset forms discrete samples from the corresponding joint probability  $p^{(n)}(\mathbf{s}, \mathbf{r})$ . We arrive at five  
 299 datasets representing theoretical predictions of the prey’s evasion behavior: one dataset for each evasion strategy. Our goal in  
 300 this section is to evaluate these predictions in comparison to experimental observations.

301 **B. Comparison to experimental observations using the Kullback-Leibler (K-L) Divergence.** We use the Kullback-Leibler diver-  
 302 gence  $\mathcal{D}_{\text{KL}}$  to quantify the goodness of fit between model prediction and experimental data. Namely,  $\mathcal{D}_{\text{KL}}$  measures the  
 303 difference between the predicted probability distribution  $p^{(n)}(\mathbf{s}, \mathbf{r})$  and the experimental probability distribution  $p_o(\mathbf{s}, \mathbf{r})$ . The  
 304 expression of the Kullback-Leibler divergence  $\mathcal{D}_{\text{KL}}$  for two  $l$ -dimensional continuous distributions  $p_o(\mathbf{x})$  and  $p^{(n)}(\mathbf{x})$ , where  
 305  $\mathbf{x} \equiv (\mathbf{s}, \mathbf{r}) \in \mathbb{R}^l$ , is given by

$$306 \quad \mathcal{D}_{\text{KL}}(p_o || p^{(n)}) = \int_{\mathbb{R}^l} p_o(\mathbf{x}) \log \frac{p_o(\mathbf{x})}{p^{(n)}(\mathbf{x})} d\mathbf{x} \geq 0. \quad [36]$$

307 The K-L divergence is not a distance metric because it is not symmetric, namely,  $\mathcal{D}_{\text{KL}}(p_o || p^{(n)}) \neq \mathcal{D}_{\text{KL}}(p^{(n)} || p_o)$ . An evaluation  
 308 of the K-L divergence from the expression in Eq. (36) is not directly feasible because we have no access to analytic expressions  
 309 of  $p_o(\mathbf{x})$  and  $p^{(n)}(\mathbf{x})$ . Instead, we have representative samples of these distributions for each predator speed  $V$ . We thus resort  
 310 to numerical estimates of the K-L divergence.

311 **C. Numerical estimates of the K-L divergence.** To estimate the K-L divergence directly from samples, we implemented the  
 312 numerical estimator proposed in (13). Given a dataset with  $N$  data points, we let  $\mathbf{x}_i^{\text{exp}} = \{\phi_i, \lambda_i, \theta_i\}$ , where  $i = 1, 2, \dots, N$ , denote  
 313 the samples from the experiment, and  $\mathbf{x}_i^{\text{model}(n)} = \{\phi_i, \lambda_i, \theta_i^{(n)}\}$ , where  $i = 1, 2, \dots, N$ , denote the corresponding predictions from  
 314 evasion model  $n$ . The discrete estimate of the K-L divergence is given by

$$315 \quad \hat{\mathcal{D}}_{\text{KL}}(p_o || p^{(n)}) = \frac{3}{N} \sum_{i=1}^N \log \frac{k^{\text{th}} \min_m \|\mathbf{x}_i^{\text{exp}} - \mathbf{x}_m^{\text{model}(n)}\|}{k^{\text{th}} \min_{m \neq i} \|\mathbf{x}_i^{\text{exp}} - \mathbf{x}_m^{\text{exp}}\|} + \log \frac{N}{N-1}, \quad [37]$$

316 where  $k^{\text{th}}$  min means the  $k^{\text{th}}$  smallest value of the argument and  $k$  is a discretization parameter to be tuned.

317 The parameter  $k$  shows up because the estimator follows the concept of  $k$ -nearest-neighbor for density estimate. In density  
 318 estimation the choice of  $k$  is related to the sample size  $N$ . Conceptually, it is guaranteed that, given a sufficiently large  
 319 sample size, the estimate converges to the actual value of the K-L divergence with  $k = 1$  (13). Practically, the choice of  $k$   
 320 is problem-dependent: a smaller  $k$  means that noise has a higher influence on the results while a larger  $k$  requires larger  
 321 sample size for the estimate to converge to the accurate value. Here, we tested the effect of different  $k$  by computing the K-L  
 322 divergence estimate from the predictions of distance-optimal strategy to all four experimental datasets. For  $k = 1$ , the noise  
 323 had an observable influence on the result. Through trial-and-error, we found that  $k = 5$  worked well. Hereafter, we set  $k = 5$   
 324 for all calculation of the estimates.

325 In fig. S10 we demonstrate the method in Eq. (37) for estimating the K-L divergence to assess the antipodal strategy  
 326 using the fast-predator dataset  $V = 20 \text{ cm}\cdot\text{s}^{-1}$  and  $N_{\text{fast}} = 215$ . For clarity of exposition, we omitted the variable  $\lambda$  from  
 327 the graphical demonstration in fig. S10, but  $\lambda$  is included in the numerical estimation of the K-L divergence. In fig. S10A,  
 328 we plot the density of occurrence of a joint  $\theta$  and  $\phi$  as a bivariate histogram: the histogram on the left is constructed from  
 329 experimental data, and the histogram on the right is constructed based on the predictions  $(\phi_i, \theta_i^{(4)} = f^{(4)}(\phi_i))$ ,  $i = 1, \dots, N_{\text{fast}}$ ,  
 330 of the antipodal strategy. In fig. S10B, the experimental data points  $(\phi_i, \theta_i)$  are plotted on the  $(\phi, \theta)$  plane as circles and  
 331 the predictions  $(\phi_i, \theta_i^{(4)})$  from the antipodal strategy are plotted as blue diamonds. Considering an experimental data point,  
 332 say the data point highlighted in green in the zoomed-in view, our algorithm identifies the five nearest neighbors from the  
 333 experimental dataset and the five nearest neighbors from the predicted results, marked in gray and black, respectively. The  
 334 distances between the green circle and its fifth neighbors from both groups give us the values of  $5^{\text{th}} \min_m \|\mathbf{x}_i^{\text{exp}} - \mathbf{x}_m^{\text{model}(n)}\|$   
 335 and  $5^{\text{th}} \min_{m \neq i} \|\mathbf{x}_i^{\text{exp}} - \mathbf{x}_m^{\text{exp}}\|$  in Eq. (37).

336 Following the same process demonstrated here, we applied the K-L divergence estimation to all four datasets with predictions  
 337 from all five evasion strategies without noise, and arrived at the twenty estimate values shown in fig.3A of the main document.  
 338 It is important to note that the values of the K-L divergence estimate obtained from different datasets are not comparable to  
 339 one another due to the difference in sample size. Only within one dataset the results from different strategies can be compared  
 340 and ranked; see main document.

## 341 6. Evaluation of Probabilistic Evasion Models with Perception and Response Noise

342 In section 4, we derived five expressions for the conditional probability  $p^{(n)}(\theta|\phi, \lambda)$ , for  $n = 1, \dots, 5$ , listed in Eqs. (29–33). In  
 343 each case, perception and response noise are accounted for using the von Mises distributions in Eq. (18) and Eq. (19), thus  
 344 introducing three unknown noise parameters  $\sigma = \{\sigma_\Phi, \sigma_\Lambda, \sigma_\Theta\}$  that describe the dispersion in perceived stimulus around the  
 345 actual state of the predator and the dispersion in actual response around the desired response. Our goal in this section is to  
 346 find optimal values for  $\sigma = \{\sigma_\Phi, \sigma_\Lambda, \sigma_\Theta\}$  given experimental data, then to rank the optimized probabilistic models based on  
 347 their parsimony and closeness to experimental observations.

348 **A. Optimization of noise parameters.** We used maximum likelihood estimation to optimize each stochastic strategy based on  
 349 the experimental data. The likelihood function for a candidate model  $n$  can be written as (14)

$$350 \mathcal{L}(\sigma | (\theta, \phi, \lambda); n) = \prod_i p^{(n)}(\theta_i, \phi_i, \lambda_i; \sigma). \quad [38]$$

351 Here  $i$  is the index of data point. We seek to calculate the set of noise parameters  $\sigma = \{\sigma_\Phi, \sigma_\Lambda, \sigma_\Theta\}$  that maximizes the total  
 352 likelihood, or equivalently, the sum of its logarithm

$$353 \sigma^* = \arg \max_{\sigma} \ln \mathcal{L}(\sigma | (\theta, \phi, \lambda); n). \quad [39]$$

354 Since the distribution  $p_o(\mathbf{s})$  of predator states does not depend on the noise parameters, we can thus ignore this part from the  
 355 expression for the joint probability  $p^{(n)}(\mathbf{s}, \mathbf{r}) = p^{(n)}(\mathbf{r}|\mathbf{s})p_o(\mathbf{s})$  and simplify the optimization problem to maximize the noise  
 356 parameters using the modified likelihood function

$$357 \mathcal{L}(\sigma | (\theta | (\phi, \lambda)); n) = \prod_i p^{(n)}(\theta_i | (\phi_i, \lambda_i); \sigma). \quad [40]$$

358 The equivalence between the original and simplified maximization objectives is straightforward,

$$\begin{aligned} 359 \sigma^* &= \arg \max_{\sigma} \sum_i \ln p^{(n)}(\theta_i, \phi_i, \lambda_i; \sigma), \\ &= \arg \max_{\sigma} \sum_i \left[ \ln p^{(n)}(\theta_i | (\phi_i, \lambda_i); \sigma) + \ln p_o(\phi_i, \lambda_i) \right], \\ &= \arg \max_{\sigma} \sum_i \ln p^{(n)}(\theta_i | (\phi_i, \lambda_i); \sigma). \end{aligned} \quad [41]$$

360 This optimization problem can be rewritten in terms of the negative log-likelihood function

$$361 \quad \text{NLL} = -\ln \mathcal{L}(\boldsymbol{\sigma} | (\theta | (\phi, \lambda)); n) = -\sum_i \ln p^{(n)}(\theta_i | (\phi_i, \lambda_i); \boldsymbol{\sigma}), \quad [42]$$

362 such that the task of calculating  $\boldsymbol{\sigma}^* = \{\sigma_\Phi^*, \sigma_\Lambda^*, \sigma_\Theta^*\}$  becomes that of minimizing the NLL,

$$363 \quad \boldsymbol{\sigma}^* = \arg \min_{\boldsymbol{\sigma}} \text{NLL}. \quad [43]$$

364 We used *fmincon* function in MATLAB to numerically find the optimal noise parameters and the likelihood of the optimized  
 365 probabilistic models. Specifically, for each dataset (slow, mid, fast, and all combined), we computed  $\boldsymbol{\sigma}^*$  for each evasion  
 366 strategy within the range of  $(0, \pi)$ .

367 We illustrate the optimization process in fig. S11 for all five evasion strategies. In fig. S11A, using the combined dataset for  
 368 all predator speeds, we varied the noise parameters in perception and motor response and we plotted the corresponding values  
 369 of NLL (Eq. (42)) as a colormap on the  $(\sigma_\Lambda, \sigma_\Theta)$  or  $(\sigma_\Phi, \sigma_\Theta)$  plane. Because of the symmetry in Eq. (29)–Eq. (31) where  $\sigma_\Phi$   
 370 and  $\sigma_\Theta$  have the same impact on the likelihood for the distance-optimal, orthogonal, and parallel strategies, we show  $\sigma_\Theta$  and  $\sigma_\Phi$   
 371 on the same axis. We verified that imposing this condition has a negligible effect on the optimized parameters and likelihoods,  
 372 whilst improves the optimization speed and stability. For every probabilistic evasion model, we select the combination of noise  
 373 parameters that results in the lowest NLL (the darkest spot in the colormap) as the optimal noise parameters for that model;  
 374 meanwhile, the lowest NLL value is used to represent the performance of the strategy given the dataset.

375 In fig. S11B, we show the optimized noise parameters obtained from the optimization procedure using *fmincon* in MATLAB.  
 376 The evaluation results presented in Fig. 3 of the main text are based on this optimization procedure. We used the open-loop  
 377 evaluation in fig. S11A to double-check our optimization procedure and to verify that our MATLAB code converges to the  
 378 correct optima. We found excellent agreement, up to machine precision, between the results of the open-loop approach  
 379 in fig. S11A and the optimization routine in fig. S11B.

380 **B. Akaike Information Criterion.** For model selection, we used the Akaike Information Criterion (AIC) to rank the optimized  
 381 models and seek a parsimonious model for the experimental data. The AIC score is defined as (15)

$$382 \quad \text{AIC} = 2K - 2 \log \mathcal{L}(\boldsymbol{\sigma} | (\theta | (\phi, \lambda)); n). \quad [44]$$

383 It considers both the goodness of fit represented by the likelihood function, and the complexity of the model. Here,  $M$  denotes  
 384 the number of estimated parameters used in the model. The criterion favors a simpler model if two models have the same  
 385 ability to explain the data.

386 In our models, the coefficient for each perception variable is pre-defined and the noise parameters  $\boldsymbol{\sigma} = \{\sigma_\Phi, \sigma_\Lambda, \sigma_\Theta\}$  are  
 387 estimated using maximum likelihood estimation, so we have  $K = 3$  for distance-optimal strategy, orthogonal strategy and  
 388 parallel strategy, and  $K = 2$  for antipodal strategy and contralateral strategy.

389 **C. Bootstrapping.** To ensure accuracy and assess the variability in the result, we used the bootstrapping method in evaluating  
 390 the probabilistic models. Starting from one dataset and one evasion model, say the dataset for the fast predator and antipodal  
 391 strategy, we constructed 200 different datasets of equal size to the original dataset by random sampling with repetition. For  
 392 each newly constructed dataset, we solved for the optimal noise parameters  $\boldsymbol{\sigma}^* = \{\sigma_\Phi^*, \sigma_\Lambda^*, \sigma_\Theta^*\}$  by following the same maximum  
 393 likelihood estimation process introduced above. Then we calculated 200 corresponding AIC scores and used the mean and the  
 394 standard deviation to show the performance of the antipodal model on the fast predator dataset. We repeated this process for  
 395 all five evasion strategies and all four datasets, thus solving a total of  $200 \times 5 \times 4 = 4,000$  optimization problems.

396 **D. Model performance based on AIC.** For the purpose of ranking the probabilistic models by the order of their fit to experimental  
 397 data, we use the AIC scores and report the difference  $\Delta\text{AIC} = \text{AIC} - \text{AIC}_{\min}$  between the average AIC and minimum AIC  
 398 among all models for the same dataset. Evaluation results are shown in Fig. 4B and Fig. 6B of the main text.

399 In addition, we quantitatively interpret  $\Delta\text{AIC}$  by computing the quantity  $\exp(-\Delta\text{AIC}/2)$ , which lies in the interval  $[0, 1]$   
 400 because  $\Delta\text{AIC}$  is non-negative. This quantity represents the relative *strength of evidence* for each model. Empirically,  $\Delta\text{AIC}$   
 401 less than 2 suggests the model is comparable to the best model, and  $\Delta\text{AIC}$  over 10 suggests the model can be omitted from  
 402 further consideration (16). In fig. S12, we plot  $\exp(-\Delta\text{AIC}/2)$  as a function of  $\Delta\text{AIC}$  (black lines), and plot the  $\Delta\text{AIC}$ s for each  
 403 evasion model in each dataset from Fig. 4B of the main text. Instead of considering one  $\Delta\text{AIC}$ s as commonly done, We retain  
 404 the entire distribution of AIC scores obtained based on bootstrapping. Focusing only on the mean value of each distribution,  
 405 all models, save the orthogonal strategy, have  $\Delta\text{AIC} \gtrsim 10$  in all four datasets. This indicates that the orthogonal strategy  
 406 consistently explains the experimental data substantially better than all the other models. Examining the entire distribution of  
 407 AIC scores, the AIC scores of the distance-optimal strategy always overlaps with the AIC scores of the orthogonal strategy  
 408 within one standard deviation. The AIC scores of antipodal strategy also overlaps with the orthogonal strategy in all but the  
 409 fast dataset. The AIC scores of parallel strategy and contralateral strategy are always substantially higher than the AIC scores  
 410 of the orthogonal strategy in all datasets, showing that they clearly are not supported by the experimental data. Therefore, we  
 411 exclude the parallel and contralateral strategies from further analysis and do not show their results in fig. 6B of the main text,  
 412 where we incorporate the physical constraint in turning.

413 **E. Levels of perception and motor noise can be used to further discriminate between evasion models.** From a biological  
414 perspective: if a sensory cue is too noisy, it is not wise to make evasion decisions based on that sensory cue; it is better to rely  
415 on robust sensory cues. In turn, an evasion strategy is reasonable if the predicted mean of prey response  $\hat{\theta}$  is close to the most  
416 likely value of  $\theta$  given the predator state  $(\phi, \lambda)$ , such that the response noise  $\sigma_{\Theta}$  merely adds dispersion to the model prediction  
417  $\hat{\theta}$ . Mathematically, if a noise parameter needs to be very large to best fit the data, it probably indicates that the corresponding  
418 strategy is not a reasonable evasion strategy.

419 In most evasion models, a clear global minimum at moderate noise levels seems to exist (fig. S11). However, in the  
420 distance-optimal strategy, the NLL changes slowly along the  $\sigma_{\Lambda}$  axis and the optimal noise  $\sigma_{\Lambda}^*$  occasionally converges to  $\pi$ ,  
421 implying that the optimal noise level in  $\lambda$  is not unique. Based on the above discussion, this suggests the predator heading  
422 deviation  $\lambda$  is not very helpful. In comparison, the NLL always converges to one minimum at relatively small  $\sigma_{\Lambda}^*$  for the  
423 orthogonal strategy, suggesting that  $\lambda$  plays a more reliable role in the orthogonal strategy.

## 424 7. Further Analysis of the Distance-Optimal Strategy

425 The distance-optimal strategy has an important parameter  $\chi = \cos^{-1}(U/V)$  that depends on the ratio between prey speed  $U$   
426 and predator speed  $V$  and that takes values between  $0^\circ$  and  $90^\circ$  (fig. S13). In the case of a very fast predator  $U/V \rightarrow 0$ , we  
427 have  $\chi = 90^\circ$  and the distance-optimal strategy converges to the orthogonal strategy. At the other extreme, when the prey is  
428 faster than the predator, the distance-optimal strategy converges to the parallel strategy.

429 One challenge in the assessment of distance-optimal strategy is that we do not know whether prey sense the speed ratio  $U/V$   
430 in real time and adjust the angle  $\chi$  accordingly, or whether the prey responds with a prior knowledge of  $\chi$  that is hardwired in  
431 the prey. The predator speed was controlled at three constant values  $V = 2, 11, 20 \text{ cm s}^{-1}$ , whereas the zebrafish larvae used in  
432 all experiments were almost identical, implying that the speed ratio  $U/V$  could vary drastically between evasion instances: for  
433 the fast predator, it could be up to 10 fold that of the slow predator. If the prey were to sense and use the real-time speed  
434 ratio to implement the distance-optimal strategy, we would expect the best performance of the distance optimal strategy to  
435 be at different value of  $\chi$  depending on the dataset (slow, mid, or fast predator). In this section, we test this proposition by  
436 treating  $\chi$  as a model parameter and evaluating the performance of the distance optimal strategy as a function of  $\chi \in [0, 90^\circ]$ .

437 **A. Side note.** Another major consideration in evaluating the distance optimal strategy is that the actual speed ratio  $U/V$  is  
438 ambiguous during the C-start response: the prey starts from almost zero speed and abruptly accelerates while its orientation  
439 also changes rapidly. This is different from the assumption adopted in mathematically deriving the distance-optimal model (10),  
440 where the two involved parties (predator and prey) swim at constant speed and constant orientation. Although in general, the  
441 predator has a higher free-swimming speed, the prey can reach an exceptionally high instantaneous speed during the short time  
442 of a C-start response (17), and it is unclear which speed should be used in optimizing the minimal distance in Eq. (7). In the  
443 evaluation presented in fig. 3 of the main text, we chose  $U/V = 1/2$  and  $\chi = 60^\circ$ .

444 **B. Performance of optimized strategy as a function of speed ratio between predator and prey.** We evaluated the distance-  
445 optimal strategy for each of the four datasets (slow, mid, fast and all data combined) as a function of  $\chi \in [0, 90^\circ]$ . In fig. S14  
446 we show the change in evaluation results of distance-optimal strategy as we increase  $\chi$  incrementally by  $5^\circ$  from  $0^\circ$  to  $90^\circ$ .  
447 Specifically, in fig. S14A, we show the K-L divergence estimate for the probabilistic models without noise and in fig. S14B,  
448 we give the NLL values for the model with optimized noise, where for each value of  $\chi$ , we performed the optimization 200  
449 times for each dataset, using the bootstrapping described in section C. That is, we performed a total of  $19 \times 200 \times 4 = 15,200$   
450 optimizations.

451 If the prey were to sense and use the real-time speed ratio to implement the distance-optimal strategy, we would expect the  
452 lowest K-L divergence estimate and NLL to appear at different values of  $\chi$  in different datasets. Instead, in fig. S14A we see  
453 the K-L divergence estimates decrease as  $\chi$  increases and reach the minimum near  $\chi = 75^\circ$  for all four datasets, and they  
454 stay relatively low as  $\chi$  increases further to  $90^\circ$ . In fig. S14B, we see a similar trend that the NLLs for all datasets drop as  $\chi$   
455 increases until they reach a minimum at or close to  $\chi = 90^\circ$ . These results suggest that prey do not calculate the angle  $\chi$  by  
456 sensing the real-time predator speed.

457 **C. Re-examining optimal noise levels as a function of speed ratio between predator and prey.** The same conclusion can be  
458 strengthened by examining the values of the optimized noise parameters. At  $\chi$  near zero, the optimizer avoids large values of  
459  $\sigma_{\Lambda}$  because they cause the distance-optimal strategy to reduce to the pure-protean strategy, for which  $\text{NLL} = -N \ln(1/2\pi) =$   
460  $1.8379N$  (where  $N$  is the sample size). Thus, the optimizer is challenged to find noise values for which  $\text{NLL} \leq 1.8379N$ .  
461 As  $\chi$  increases, the distance-optimal strategy resembles a variant of the antipodal strategy, which has lower NLLs than the  
462 pure-protean strategy even at large  $\sigma_{\Lambda}$ . In the range  $20^\circ \lesssim \chi \lesssim 75^\circ$ , the optimizer often chooses the largest possible value of  
463  $\sigma_{\Lambda}^* \rightarrow \pi$  to produce the optimized NLLs. Taken together, the larger values of NLL at  $\chi \lesssim 20^\circ$  and the large values of optimal  
464  $\sigma_{\Lambda}$  in the range  $20^\circ \lesssim \chi \lesssim 75^\circ$  indicate that  $\lambda$  is not an effective sensory cue for  $\chi \lesssim 75^\circ$ . As  $\chi$  gets closer to  $90^\circ$ , lower values  
465 of  $\sigma_{\Lambda}$  lead to lower NLL values (see fig. S14B). Therefore, the prey is unlikely to use the distance-optimal strategy at small  
466 values of  $\chi$ ; this strategy is best used for  $\chi \rightarrow 90^\circ$ , thus favoring the orthogonal strategy.

## 467 8. Fish Evasion Mechanics: C-start Maneuver

468 Larval zebrafish execute a ‘‘C-start’’ or ‘‘fast start’’ to reorient themselves rapidly in response to predators (18). The prey  
 469 bends its body into a ‘‘C’’ shape from a straight configuration within the order of 10ms (17). Computational work found that  
 470 pressure-driven action-reaction forces are dominant in C-start maneuvers, whereas vorticity generated during this short process  
 471 has negligible effects on fish motion (19). Thus, to investigate the evasion mechanics, we adopt a simplified 3-link fish model in  
 472 potential flow (20, 21) which ignores the effects of viscosity and vortex shedding, but accounts for reactive hydrodynamic forces  
 473 through the added mass effect.

474 **A. Fish kinematics.** To describe planar motions of the three-link fish, we let  $\mathbf{x} = (x, y)$  denote the position of the center of  
 475 mass  $G$  of the middle link, and  $\beta$  denote the orientation of the fish relative to a fixed inertial frame, here taken to be the angle  
 476 between the  $x$ -axis and the major axis of symmetry of the middle link. Let  $\alpha_1$  and  $\alpha_2$  be the rotation angles of the front link  
 477 relative to the middle link and the middle link relative to the rear link; that is to say,  $(\alpha_1, \alpha_2)$  represents the shape of the  
 478 three-link fish.

479 It is convenient for the following development to introduce a body-fixed frame  $(\mathbf{b}_1, \mathbf{b}_2)$ , attached at  $G$  and co-rotating  
 480 with the middle link. This body-fixed frame is related to the inertial frame  $(\mathbf{e}_1, \mathbf{e}_2)$  via a rigid-body rotation such that  
 481  $\mathbf{e}_1 = \cos \beta \mathbf{b}_1 - \sin \beta \mathbf{b}_2$  and  $\mathbf{e}_2 = \sin \beta \mathbf{b}_1 + \cos \beta \mathbf{b}_2$ . The velocity  $(\dot{x}, \dot{y})$  of the center of mass of the middle link, when expressed  
 482 in the body-fixed frame, is given by

$$483 \quad \mathbf{v} = v_1 \mathbf{b}_1 + v_2 \mathbf{b}_2 = (\dot{x} \cos \beta + \dot{y} \sin \beta) \mathbf{b}_1 + (-\dot{x} \sin \beta + \dot{y} \cos \beta) \mathbf{b}_2 \quad [45]$$

484 Assuming all three links are made of identical ellipsoids of major axis  $a$ , and minor axes  $b = 0.2a, c = a$ , the velocities of  
 485 the centers of mass  $G_1$  and  $G_2$  of the front and rear link, expressed in the body-fixed frame of the middle link, are given by  
 486 ( $i = 1, 2$ , denote the front and rear links, respectively)

$$487 \quad \mathbf{v}_i = (v_1 \mp a \dot{\alpha}_i \sin \alpha_i) \mathbf{b}_1 + (v_2 \pm a \dot{\beta} + a \dot{\alpha}_i \cos \alpha_i) \mathbf{b}_2. \quad [46]$$

488 The angular velocities of the middle, front, and rear links are given by  $\dot{\beta}$ ,  $\dot{\beta} + \dot{\alpha}_1$ , and  $\dot{\beta} - \dot{\alpha}_2$  respectively.

489 **B. Kinetic energy of the three-link fish.** The kinetic energy of the fish is given by

$$490 \quad T_{\text{prey}} = \frac{1}{2} m_s \mathbf{v} \cdot \mathbf{v} + \frac{1}{2} J_s \dot{\beta}^2 + \frac{1}{2} \sum_{i=1,2} [m_s \mathbf{v}_i \cdot \mathbf{v}_i + J_s (\dot{\beta} \pm \dot{\alpha}_i)^2] \quad [47]$$

491 where  $m_s = \frac{4}{3} abc \rho_s$  and  $J_s = \frac{1}{5} (a^2 + b^2) m_s$  are the mass and moment of inertia of each solid link with  $\rho_s$  the density of the  
 492 links.

493 **C. Kinetic energy of the fluid.** The three-link fish is submerged in an unbounded domain of incompressible and irrotational  
 494 fluid, such that the fluid velocity  $\mathbf{u} = \nabla \Phi$  can be expressed as the gradient of a potential function  $\Phi$ . It is a standard result  
 495 in potential flow theory that the kinetic energy of the fluid can be expressed in terms of the variables of the submerged  
 496 solid (20–22). In the case of a single ellipsoid, the kinetic energy of the fluid is given by  $T_{\text{fluid}} = [(m_{1a} v_1^2 + m_{2a} v_2^2) + J \dot{\beta}^2]/2$ ,  
 497 where  $m_{1a}$ ,  $m_{2a}$  and  $J_a$  are the added mass and the added moment of inertia due to the presence of the fluid, expressed in a  
 498 body-fixed frame that coincides with the major and minor axes of the ellipsoid. The added mass and moment depend on the  
 499 geometric shape  $a, b, c$  of the submerged ellipsoid and the fluid density  $\rho_f$  (23). For a non-spherical body, the added masses  
 500  $m_{1a}$ ,  $m_{2a}$  depend on the direction of motion: the added mass is larger when moving in the direction of the minor axis of  
 501 symmetry of the ellipsoid, that is to say, in the transverse direction; hence  $m_1 \leq m_2$ . For the three-link fish, the kinetic energy  
 502 of the fluid is of the form

$$503 \quad T_{\text{fluid}} = \frac{1}{2} m_{1a} v_1^2 + \frac{1}{2} m_{2a} v_2^2 + \frac{1}{2} J_a \dot{\beta}^2 + \frac{1}{2} \sum_i J_a (\dot{\beta} \pm \alpha_i)^2 \\
 504 \quad + \frac{1}{2} \sum_i m_{1a} (v_1 \cos \alpha_i \pm v_2 \sin \alpha_i + a \dot{\beta} \sin \alpha_i)^2 \quad [48] \\
 505 \quad + \frac{1}{2} \sum_i m_{2a} (\mp v_1 \sin \alpha_i + v_2 \cos \alpha_i \pm a \dot{\beta} \cos \alpha_i \pm a \dot{\beta} + a \dot{\alpha}_i)^2.$$

504 **D. Kinetic energy of the fish-fluid system.** The kinetic energy of the fish-fluid system is obtained by taking the sum of Eq. (47)  
 505 and Eq. (48), which can be expressed in matrix form as follows:

$$506 \quad T = T_{\text{prey}} + T_{\text{fluid}} = \frac{1}{2} \begin{bmatrix} v_1 \\ v_2 \\ \dot{\beta} \\ \dot{\alpha}_1 \\ \dot{\alpha}_2 \end{bmatrix}^T \begin{bmatrix} & & & & \\ & \mathbb{I}_{\text{lock}} & & & \mathbb{I}_{\text{couple}} \\ & & & & \\ & & & & \\ & & \mathbb{I}_{\text{couple}}^T & & \mathbb{I}_{\text{shape}} \end{bmatrix} \begin{bmatrix} v_1 \\ v_2 \\ \dot{\beta} \\ \dot{\alpha}_1 \\ \dot{\alpha}_2 \end{bmatrix}, \quad [49]$$



507 Here,  $\mathbb{I}_{\text{shape}}$  is a  $2 \times 2$  matrix associated with shape deformation,

$$508 \quad \mathbb{I}_{\text{shape}} = \begin{bmatrix} J + m_2 a^2 & 0 \\ 0 & J + m_2 a^2 \end{bmatrix}. \quad [50]$$

509 where  $m_1 = m_s + m_{1a}$ ,  $m_2 = m_s + m_{2a}$ , and  $J = J_s + J_a$ .  $\mathbb{I}_{\text{couple}}$  is a  $3 \times 2$  matrix that couples rigid body motion with shape  
510 deformation,

$$511 \quad \mathbb{I}_{\text{couple}} = \begin{bmatrix} -m_2 a \sin \alpha_1 & m_2 a \sin \alpha_2 \\ m_2 a \cos \alpha_1 & m_2 a \cos \alpha_2 \\ J + m_2 a^2 (1 + \cos \alpha_1) & -J - m_2 a^2 (1 + \cos \alpha_2) \end{bmatrix}. \quad [51]$$

512 Finally,  $\mathbb{I}_{\text{lock}}$  is a  $3 \times 3$  locked mass matrix, function of  $\alpha_1$  and  $\alpha_2$ ,

$$513 \quad \mathbb{I}_{\text{lock}} = \begin{bmatrix} \mathbb{M} & \vdots & \mathbb{D} \\ \cdots & \mathbb{J} & \cdots \\ \mathbb{D}^\top & \vdots & \mathbb{J} \end{bmatrix}, \quad [52]$$

514 where  $\mathbb{M}$  is a  $2 \times 2$  mass matrix given by

$$515 \quad \mathbb{M} = \begin{bmatrix} m_1 \left(1 + \sum_i \cos^2 \alpha_i\right) + m_2 \sum_i \sin^2 \alpha_i & \frac{1}{2}(m_1 - m_2)(\sin 2\alpha_1 - \sin 2\alpha_2) \\ \frac{1}{2}(m_1 - m_2)(\sin 2\alpha_1 - \sin 2\alpha_2) & m_2 \left(1 + \sum_i \cos^2 \alpha_i\right) + m_1 \sum_i \sin^2 \alpha_i \end{bmatrix}, \quad [53]$$

516  $\mathbb{J}$  is a moment-of-inertia scalar given by

$$517 \quad \mathbb{J} = 3J + m_1 a^2 \sum_i \sin^2 \alpha_i + m_2 a^2 \sum_i (1 + \cos \alpha_i)^2, \quad [54]$$

518 and  $\mathbb{D}$  couples the translational and rotational motion of the fish. For a single ellipsoid,  $\mathbb{D}$  is identically zero. For the three-link  
519 fish, it is given by

$$520 \quad \mathbb{D} = \begin{bmatrix} \frac{1}{2}(m_1 - m_2)a \sum_i \sin 2\alpha_i - m_2 a \sum_i \sin \alpha_i \\ \frac{1}{2}(m_1 - m_2)a(\cos 2\alpha_2 - \cos 2\alpha_1) + m_2 a(\cos \alpha_1 - \cos \alpha_2) \end{bmatrix}. \quad [55]$$

521 **E. Local connection matrix.** We define a *local connection matrix*  $\mathbb{A} = -\mathbb{I}_{\text{lock}}^{-1} \mathbb{I}_{\text{couple}}$ , where the entries  $A_{xi}, A_{yi}, A_i$  ( $i = 1, 2$ ) of  
522 the connection matrix  $\mathbb{A}$  are nonlinear functions of  $\alpha_1, \alpha_2$ , (see (20, 21, 24, 25))

$$523 \quad \mathbb{A} = -\mathbb{I}_{\text{lock}}^{-1} \mathbb{I}_{\text{couple}} = \begin{bmatrix} A_{x1} & A_{x2} \\ A_{y1} & A_{y2} \\ A_1 & A_2 \end{bmatrix}. \quad [56]$$

524 The local connection matrix  $\mathbb{A}$  is a function of the variables  $(\alpha_1, \alpha_2)$  that define the shape of the three-link fish. Specifically,  
525  $\mathbb{A}$  defines three vector fields  $\mathbf{A}_x \equiv (A_{x1}, A_{x2})$ ,  $\mathbf{A}_y \equiv (A_{y1}, A_{y2})$ , and  $\mathbf{A} \equiv (A_1, A_2)$  over the shape space  $(\alpha_1, \alpha_2)$  as shown in  
526 fig. S15(A).

527 **F. Equations of motion.** In the absence of external forces and torques, the equations of motion of the fish are obtained from the  
528 conservation of linear and angular momentum. Starting from rest, at zero total momentum, one gets

$$529 \quad \begin{bmatrix} \cos \beta & \sin \beta & 0 \\ -\sin \beta & \cos \beta & 0 \\ 0 & 0 & 1 \end{bmatrix} \begin{bmatrix} \dot{x} \\ \dot{y} \\ \dot{\beta} \end{bmatrix} = \begin{bmatrix} A_{x1} & A_{x2} \\ A_{y1} & A_{y2} \\ A_1 & A_2 \end{bmatrix} \begin{bmatrix} \dot{\alpha}_1 \\ \dot{\alpha}_2 \end{bmatrix}. \quad [57]$$

530 Eq. (57) provides a set of first-order differential equations that can be integrated numerically to obtain the state  $(x, y, \beta)$  for  
531 prescribed cyclic shape changes in the  $(\alpha_1, \alpha_2)$  plane. Translations motions  $(x, y)$  and rotational motions  $\beta$  of the fish are  
532 dictated by the connection matrix  $\mathbb{A}$ . Translations are coupled to rotations via  $\mathbb{A}$ .

533 Rotations  $\beta$ , are directly proportional to the line integral of the vector field  $\mathbf{A} = (A_1, A_2)$ . Considering cyclic shape changes  
534 in the  $(\alpha_1, \alpha_2)$  plane and using Green's Theorem, we get, considering the last row of Eq. (57),

$$535 \quad \beta(T) - \beta(0) = \oint_C d\beta = \oint_C (A_1 d\alpha_1 + A_2 d\alpha_2) = \iint_S \text{curl}_2(\mathbf{A}) d\alpha_1 d\alpha_2 = \iint_S \left( \frac{\partial A_2}{\partial \alpha_1} - \frac{\partial A_1}{\partial \alpha_2} \right) d\alpha_1 d\alpha_2. \quad [58]$$

536 Here,  $T$  is the time required to go around the closed trajectory in the shape space once; note that a re-scaling of time does not  
537 affect how the motion of the fish depends on  $(\alpha_1, \alpha_2)$ , only the speed at which the fish completes these cyclic shape changes.



538 **G. Turning versus swimming gaits.** In fig. S15A, we show the three scalar fields defined by  $\text{curl}_2 \mathbf{A}_x$ ,  $\text{curl}_2 \mathbf{A}_y$ , and  $\text{curl}_2 \mathbf{A}$ ,  
539 where the normalized curls are visualized as a colormap (from blue to orange) over the  $(\alpha_1, \alpha_2)$  plane. The scalar fields  $\text{curl}_2 \mathbf{A}_x$ ,  
540  $\text{curl}_2 \mathbf{A}_y$ , and  $\text{curl}_2 \mathbf{A}$  are informative of the net motions  $(x, y, \beta)$  of the fish, but whereas rotations  $\beta$  are directly proportional  
541 to the area integral of  $\text{curl}_2 \mathbf{A}$ , translational motions  $(x, y)$  are not directly proportional to the area integrals of  $\text{curl}_2 \mathbf{A}_x$  and  
542  $\text{curl}_2 \mathbf{A}_y$ , due to their coupling with rotations  $\beta$ , as evident from Eq. (57).

543 To illustrate the utility of the scalar fields  $\text{curl}_2 \mathbf{A}_x$ ,  $\text{curl}_2 \mathbf{A}_y$ , and  $\text{curl}_2 \mathbf{A}$  shown in fig. S15A, we show two examples of cyclic  
544 shape changes depicted in black and red. Mathematically, these trajectories are closed circles of radius  $A$  such that

$$\begin{aligned} \text{Turning gait:} \quad \alpha_1(t) &= \frac{1}{\sqrt{2}} \left[ A \left( 1 - \cos \frac{2\pi t}{T} \right) + A \sin \frac{2\pi t}{T} \right], & \alpha_2(t) &= \frac{1}{\sqrt{2}} \left[ A \left( 1 - \cos \frac{2\pi t}{T} \right) - A \sin \frac{2\pi t}{T} \right], \\ \text{Swimming gait:} \quad \alpha_1(t) &= \frac{1}{\sqrt{2}} \left[ A \cos \frac{2\pi t}{T} - A \sin \frac{2\pi t}{T} \right], & \alpha_2(t) &= \frac{1}{\sqrt{2}} \left[ A \cos \frac{2\pi t}{T} + A \sin \frac{2\pi t}{T} \right]. \end{aligned} \quad [59]$$

546 For both examples, we chose  $A = \pi/3$ . For the shape deformations following the red trajectory, the corresponding maximum  
547 bending angle is given by  $\alpha_{\max} = \sqrt{2}A$ . At  $t = 0$ , the fish is straight and  $\alpha_1 = \alpha_2 = 0$  (point T1 in fig. S15A). For  $0 < t < T/2$ ,  
548 the fish bends its body to one side;  $\alpha_1$  increases first and  $\alpha_2$  catches up till they meet at the same value  $\alpha_1 = \alpha_2$ , where their  
549 sum is maximal (point T2 in fig. S15A). For  $T/2 < t < T$ , the fish unfurls its body;  $\alpha_1$  and  $\alpha_2$  decrease back to zero. At  $t = T$ ,  
550 the fish recovers to a straight line (point T4 in fig. S15A). In the swimming (black curve in fig. S15A), the three-link fish starts  
551 in a deformed shape (point S1 in in fig. S15A) and undulates its body cyclically to both sides.

552 For each trajectory, we numerically integrate Eq. (57) to obtain the translational motion  $x(t)$  and  $y(t)$  and orientation  
553  $\beta(t)$  of the fish model. Note that  $\beta(t)$  can be solved analytically following the expression in Eq. (58) and substituted back  
554 into Eq. (57) to numerically solve for  $x(t)$  and  $y(t)$ . A fish changing its shape following the black curve in fig. S15A will  
555 undergo zero net rotations and zero net displacement in the  $y$ -direction, but it will swim forward in the  $x$ -direction as shown  
556 in fig. S15B. A fish following the red line in fig. S15A will undergo a positive net rotation and a negligible displacement in both  
557 the  $x$ - and  $y$ -directions as shown in fig. S15C. We emphasize that time is inconsequential in these motions: a re-scaling of time  
558 neither affects the fish shape deformations  $(\alpha_1, \alpha_2)$  nor its locomotion  $(x, y, \beta)$ , only the speed at which the fish follows these  
559 trajectories.

## 560 9. Comparison of C-start Model to Experimental Data

561 **A. Experimental measurements of C-start kinematics.** In (26), the authors measured the excursions of the fish body during an  
562 evasive response. They divided the fish body into 4 sections of equal length and recorded the orientation of each section relative  
563 the initial orientation of the fish as a function of time. To use these experimental measurements in our 3-link fish model, we  
564 averaged the excursion of the middle two sections and considered that to be the change in orientation  $\theta$ . We computed the  
565 difference in excursion between the first section and  $\theta$  and the difference in excursion between  $\theta$  and the last section, and we  
566 considered these differences to be the shape angles  $\alpha_1, \alpha_2$  in the three-link model. The shape trajectory  $(\alpha_1, \alpha_2)$  based on the  
567 experimental measurements is shown in S15A in grey dots. The values of  $\theta$  from experimental measurements is shown in Fig. 4  
568 of the main text.

569 **B. Comparison between experimental measurements and three-link fish model.** We fitted the experimental data  $(\alpha_1, \alpha_2)$  with  
570 a third-order Fourier series; results shown in light blue line in S15A. We then used this fitted trajectory  $(\alpha_1, \alpha_2)$  as input to  
571 the 3-link fish model in Eq. (58) and compared the results obtained from the three-link model to the experimental values of  $\theta$ ;  
572 results are shown in Fig. 4 of the main text.

573 Remarkably, the experimentally-constructed shape motion  $(\alpha_1, \alpha_2)$  (light blue line in fig. S15A) resembles the model-based  
574 shape trajectories (red and black circles in fig. S15A) if we start from the origin, follow the red line, then join the black line at  
575 the location where the red and black trajectories intersect, indicated by a green star in S15A.

576 We numerically integrated Eq. (57) using the synthetic shape motion (with  $\alpha_1$  and  $\alpha_2$  tracing the red then black trajectories  
577 in S15A) and the experimentally-obtained C-start maneuver (with  $\alpha_1$  and  $\alpha_2$  tracing the light blue trajectory in S15A). Note  
578 that for the synthetic shape changes (tracing the red then black lines in fig. S15A), we chose the time scale to match the time  
579 scale in the experimentally-observed C-start (blue line in fig. S15A). The fish first turns then begins to swim forward in a  
580 post C-start direction. Snapshots of the fish body shape are shown in fig. S15D and time evolution of  $x$ ,  $y$ , and  $\beta$  are shown  
581 in fig. S15E; the displacements  $x$  and  $y$  are shown in solid and dashed lines in the top panel of S15E, with no corresponding  
582 experimental data available for comparison, while the rotational motion  $\beta$  is shown in the bottom panel of fig. S15E. The  
583 experimentally-obtained change in heading  $\theta$  (grey dots) is superimposed for comparison. Remarkably, the rotational motion  
584 obtained based on the three-link fish model accurately matches the body rotation observed experimentally in the C-start  
585 response.

586 **C. Mechanical constraints on prey reorientation.** Inspired by the fact that the synthetic turning gait (red curve in fig. S15A)  
587 accurately predicts the rotational response observed experimentally during a C-start maneuver, we use the three-link model to  
588 probe the mechanical constraints on the reorientation angle  $\theta = \beta(T) - \beta(0)$  during evasion. To this end, we construct a family  
589 of elliptic trajectories in the shape space  $\alpha_1, \alpha_2$  that are adapted from Eq. (59) to produce net rotations,

$$\alpha_1(t) = \frac{1}{\sqrt{2}} \left[ A \left( 1 - \cos \frac{2\pi t}{T} \right) + B \sin \frac{2\pi t}{T} \right], \quad \alpha_2(t) = \frac{1}{\sqrt{2}} \left[ A \left( 1 - \cos \frac{2\pi t}{T} \right) - B \sin \frac{2\pi t}{T} \right]. \quad [60]$$

591 The corresponding maximum bending angle is given by  $\alpha_{\max} = \sqrt{2}A$ . We varies  $\alpha_{\max}$  from 0 to  $180^\circ$ . For each  $\alpha_{\max}$ , we  
 592 solved for the value of  $B$  that maximizes the response angle  $\theta$ . Examples of the optimized trajectories are given in fig. S16A  
 593 and B. In fig. S16A, we show  $\text{curl}_2 \mathbf{A}$  for a three-link fish of negligible mass, whereas in fig. S16B, we show  $\text{curl}_2 \mathbf{A}$  for a  
 594 neutrally-buoyant three-link fish. The difference between fig. S16A and B stems from how  $\mathbf{A}$  in Eq. (56), consequently  $\mathbf{A}$ ,  
 595 changes with fish body density  $\rho$ . The optimized trajectories enclose as much as possible of the orange regions where  $\text{curl}_2 \mathbf{A}$  is  
 596 strictly positive. The net reorientation  $\theta$  resulting from tracing each of cycle of shape deformations is shown in fig. S16C as a  
 597 function of the maximum bending angle  $\alpha_{\max}$ , thus establishing a mapping from the maximum bending angle  $\alpha_{\max}$  to the  
 598 response angle  $\theta$ . We find that even at  $\alpha_{\max} = 180^\circ$ , where the fish model is fully folded, the fish cannot accomplish a  $180^\circ$   
 599 turn. This is a reflection of the mechanical constraints imposed by the mechanics of the fish and fish-fluid interactions on the  
 600 turning angle  $\theta$ . At  $\alpha_{\max} = 120^\circ$  which is the largest experimentally-observed value of bending angle in (27), the turning angle  
 601  $\theta$  is barely  $100^\circ$ .

602 **D. Effort in performing cyclic shape deformations.** We assume the total time  $T$  to trace each of the shape trajectories in fig. S16A  
 603 and fig. S16B is constant, and we evaluate the total energy associated with these shape deformations

$$604 \quad E = \int_0^T T_{\text{shape}}(t)dt = \frac{1}{2}(J + m_2 a^2) \int_0^T (\dot{\alpha}_1^2(t) + \dot{\alpha}_2^2(t))dt. \quad [61]$$

605 In fig. S17, we show the energy associated as a function of the response angle  $\theta$  for the family of shape changes  $\alpha_1(t), \alpha_2(t)$   
 606 in Eq. (60) parameterized by  $A$ .

607 **E. Statistical evidence of the physical constraint in C-start response..** Now that we have established that the C-start mechanics  
 608 fish imposes constraints and limits on large turning motions, we look at our experimental dataset again to probe the scarcity of  
 609 large prey response. In fig. S17A, we show the frequencies of the magnitude  $|\theta|$  of prey responses recorded experimentally and  
 610 of those predicted by the distance-optimal strategy and the orthogonal strategy without noise. We calculate a ‘prediction error’  
 611 by subtracting the frequencies of the experimental data from the predicted frequencies (fig. S17B). Superimposed on this plot,  
 612 we show the actuation effort computed following Eq. (61). Apart one exception point in the distance-optimal strategy, both  
 613 strategies predict higher frequencies of evasion angles  $\theta$  that exceed  $100^\circ$  and lower frequencies of evasion angles below  $100^\circ$   
 614 than observed experimentally. For the orthogonal strategy, the prediction error rises sharply around  $100^\circ$ , where the actuation  
 615 effort increase sharply and non-linearly. These discrepancies between model predictions and experimental data further support  
 616 our findings based on the physics model that zebrafish larvae undergoing a C-start evasion response have difficulty performing  
 617 turns that are larger than  $100^\circ$ .

## 618 References

- 619 1. Nair A, Changsing K, Stewart WJ, McHenry MJ (2017) Fish prey change strategy with the direction of a threat. *Proceedings of the Royal Society B: Biological Sciences* 284(1857):20170393.
- 620 2. Stewart WJ, Nair A, Jiang H, McHenry MJ (2014) Prey fish escape by sensing the bow wave of a predator. *Journal of*  
 621 *Experimental Biology* 217(24):4328–4336.
- 622 3. Stewart WJ, Cardenas GS, McHenry MJ (2013) Zebrafish larvae evade predators by sensing water flow. *Journal of*  
 623 *Experimental Biology* 216(3):388–398.
- 624 4. Berens P (2009) Circstat: A matlab toolbox for circular statistics. *Journal of Statistical Software, Articles* 31(10):1–21.
- 625 5. Blaxter J, Fuiman L (1990) The role of the sensory systems of herring larvae in evading predatory fishes. *J. Mar. Biol.*  
 626 *Assoc. U. K.* 70(2):413–427.
- 627 6. McHenry M, Feitl K, Strother J, Van Trump W (2009) Larval zebrafish rapidly sense the water flow of a predator’s strike.  
 628 *Biol. Ltrs.* 5(4):477–479.
- 629 7. Easter Jr SS, Nicola GN (1996) The development of vision in the zebrafish (danio rerio). *Developmental biology*  
 630 180(2):646–663.
- 631 8. Li G, Müller UK, van Leeuwen JL, Liu H (2014) Escape trajectories are deflected when fish larvae intercept their own  
 632 c-start wake. *Journal of The Royal Society Interface* 11(101):20140848.
- 633 9. Eaton RC, Emberley DS (1991) How stimulus direction determines the trajectory of the mauthner-initiated escape response  
 634 in a teleost fish. *Journal of Experimental Biology* 161(1):469–487.
- 635 10. Weihs D, Webb P (1984) Optimal avoidance and evasion tactics in predator-prey interactions. *Journal of Theoretical*  
 636 *Biology* 106(2):189 – 206.
- 637 11. Humphries DA, Driver PM (1970) Protean defence by prey animals. *Oecologia* 5(4):285–302.
- 638 12. Schervish MJ (2012) *Theory of statistics.* (Springer Science & Business Media).
- 639 13. Perez-Cruz F (2008) Kullback-leibler divergence estimation of continuous distributions in *2008 IEEE International*  
 640 *Symposium on Information Theory.* pp. 1666–1670.
- 641 14. Rossi RJ (2018) *Mathematical statistics: an introduction to likelihood based inference.* (John Wiley & Sons).
- 642 15. Akaike H (1974) A new look at the statistical model identification. *IEEE Transactions on Automatic Control* 19(6):716–723.
- 643 16. Burnham KP, Anderson DR, eds. (2002) *Information and Likelihood Theory: A Basis for Model Selection and Inference.*  
 644 (Springer New York, New York, NY), pp. 49–97.
- 645

- 646 17. Müller UK, van Leeuwen JL (2004) Swimming of larval zebrafish: ontogeny of body waves and implications for locomotory  
647 development. *Journal of Experimental Biology* 207(5):853–868.
- 648 18. Weihs D (1973) The mechanism of rapid starting of slender fish. *Biorheology* 10(3):343–350.
- 649 19. Gazzola M, Van Rees WM, Koumoutsakos P (2012) C-start: optimal start of larval fish. *Journal of Fluid Mechanics*  
650 698:5–18.
- 651 20. Kanso E, Marsden JE (2005) Optimal motion of an articulated body in a perfect fluid in *Proceedings of the 44th IEEE*  
652 *Conference on Decision and Control*. (IEEE), pp. 2511–2516.
- 653 21. Kanso E, Marsden JE, Rowley CW, Melli-Huber JB (2005) Locomotion of articulated bodies in a perfect fluid. *Journal of*  
654 *Nonlinear Science* 15(4):255–289.
- 655 22. Lamb H (1945) *Hydrodynamics*, Dover Books on Physics. (Dover publications).
- 656 23. Leonard NE (1997) Stability of a bottom-heavy underwater vehicle. *Automatica* 33(3):331–346.
- 657 24. Hatton RL, Choset H (2010) Connection vector fields and optimized coordinates for swimming systems at low and high  
658 reynolds numbers in *ASME 2010 Dynamic Systems and Control Conference*. (American Society of Mechanical Engineers  
659 Digital Collection), pp. 817–824.
- 660 25. Jiao Y, et al. (2021) Learning to swim in potential flow. *Physical Review Fluids* 6(5):050505.
- 661 26. Nair A, Azatian G, McHenry MJ (2015) The kinematics of directional control in the fast start of zebrafish larvae. *Journal*  
662 *of Experimental Biology* 218(24):3996–4004.
- 663 27. Voesenek CJ, Pieters RPM, Muijres FT, van Leeuwen JL (2019) Reorientation and propulsion in fast-starting zebrafish  
664 larvae: an inverse dynamics analysis. *Journal of Experimental Biology* 222(14).
- 665 28. Jammalamadaka SR, Sengupta A (2001) *Topics in circular statistics*. (world scientific) Vol. 5.

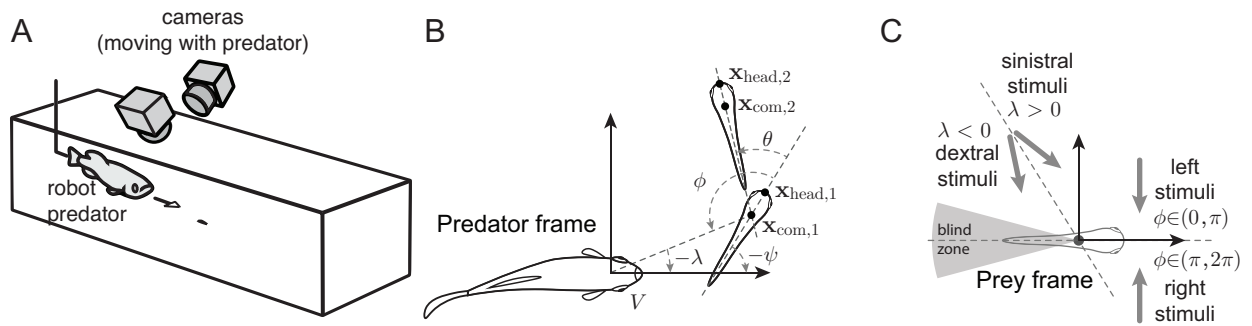

**Fig. S1. Experimental measurement of evasion behavior in zebrafish larvae.** (A) Experiment setup. The preys were initially motionless in the water tank. The robot predator was controlled to approach the preys at a certain speed and two cameras were used to record the evasion response. (B) Locations of the fish center-of-mass and fish head were measured right before and after the evasion response in the predator's frame of reference. The measurements were then processed to derive the perceived predator state  $\phi$ ,  $\psi$ ,  $\lambda$  in the prey's frame of reference, as well as the prey response  $\theta$ . (C) Categories of stimuli considered in the candidate strategies based on the sign of  $\phi$  or  $\lambda$ .

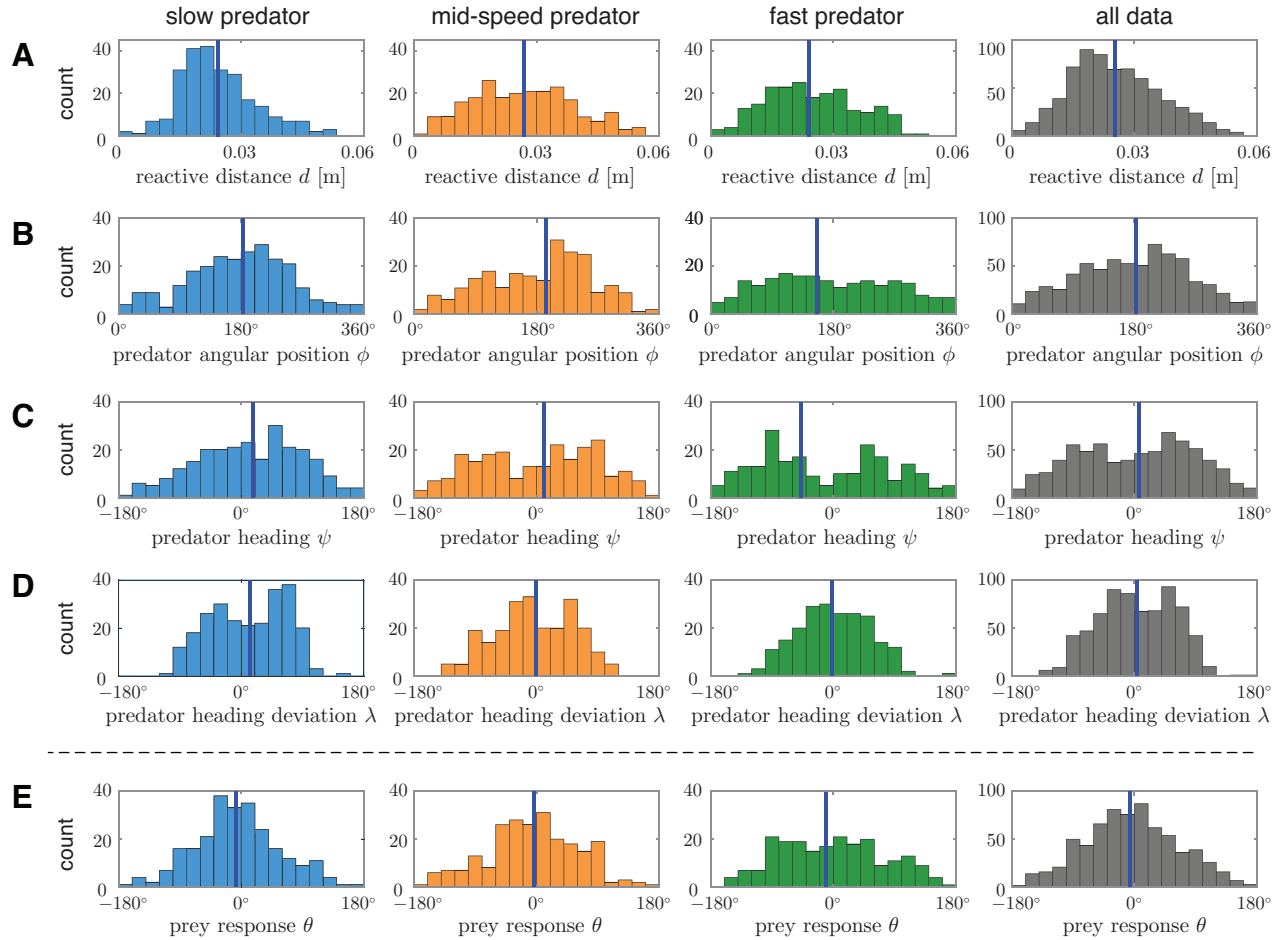

**Fig. S2. Univariate histograms of experimental data.** (A)-(D) Predator state at the onset of evasion. (E) Prey response, i.e., change in orientation during evasion. Three left columns show three datasets organized by predator speed; last column shows all data combined. In each histogram, the mean value is marked by blue line. For the angular variables  $\phi$ ,  $\psi$ ,  $\lambda$ , we computed circular means using the Matlab Circular Statistics Toolbox (4, 28) and defined the proper range of angles based on the means.

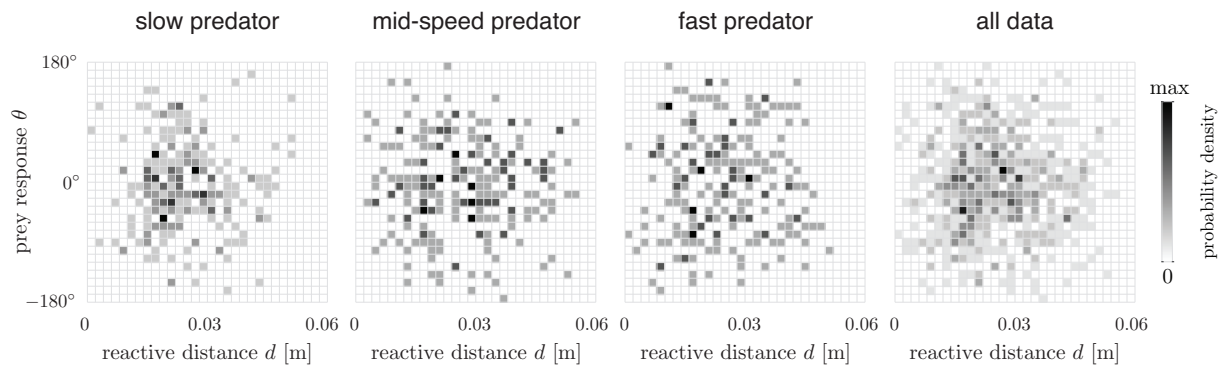

**Fig. S3. Bivariate histograms between reactive distance  $d$  and prey response  $\theta$  at evasion.** The intensity of gray represents the data occurrence density. From left to right, the linear-circular correlation coefficient is  $C = 0.04809, 0.09034, 0.07005, 0.06974$  and the p-value is  $p = 0.7481, 0.3864, 0.5901, 0.1827$ . That is, there is no significant correlation between the prey's escape direction  $\theta$  and the reaction distance  $d$  at the onset of evasion.



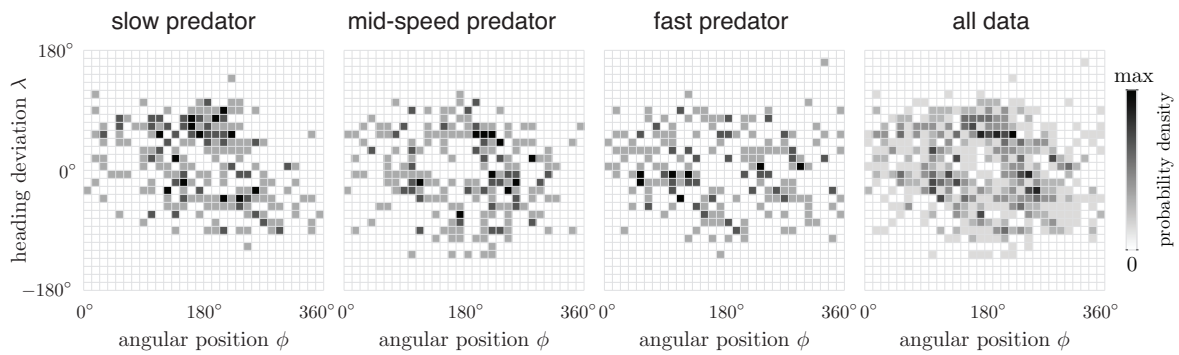

**Fig. S4. Bivariate histograms between predator's angular position  $\phi$  and relative heading  $\lambda$  at the onset of evasion.** We notice two trends: First, the data density is low in the center of each histogram ( $\phi \approx 180^\circ$ ,  $\lambda \approx 0$ ). This is when the predator appears in the 'blind zone' of the zebrafish larvae vision and flow sensing modalities; see fig. S1C. However, even for  $\phi$  equal or close to  $180^\circ$ , evasion is triggered for larger values of the predator's heading deviation  $\lambda$  at all predator speeds. Second, at slow predator speed, there is a weak correlation between the magnitude of the two measurements of predator's angular position  $\phi$  and relative heading  $\lambda$ , as evidenced by the circular correlation coefficient is  $C = -0.2571, -0.1278, -0.0736$  and the p-value  $p = 0.0000, 0.0346, 0.2472$  for slow, mid-speed, and fast predators, respectively. That is, at slow predator speed, the prey is more likely to escape when the predator is heading towards the front side of prey ( $\lambda > 0$  for  $0^\circ < \phi < 180^\circ$  and  $\lambda < 0$  for  $180^\circ < \phi < 360^\circ$ ), as opposed to when the predator is heading towards the back of from the prey. This correlation gets weaker for faster predator. Here, and in all subsequent statistical analysis, the circular correlation coefficients were calculated using the MATLAB Circular Statistics Toolbox (4, 28).

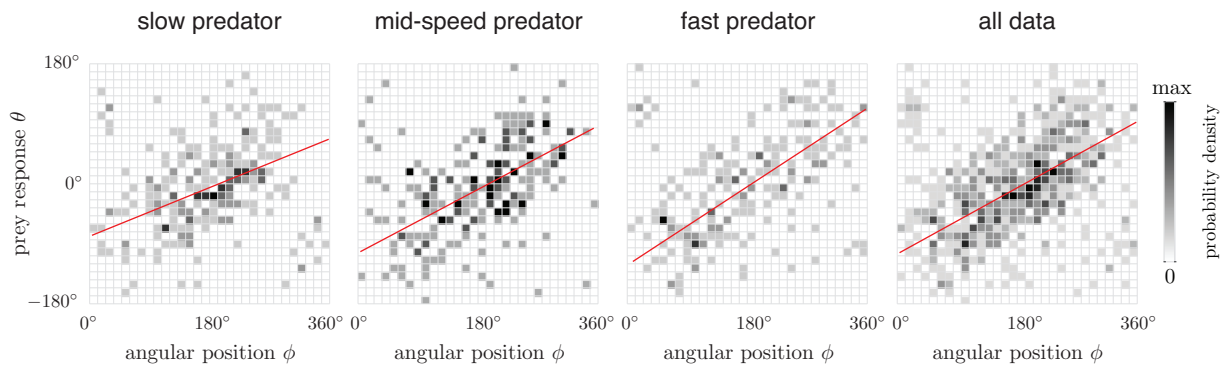

**Fig. S5. Bivariate histograms between predator angular position  $\phi$  and prey response  $\theta$ .** The intensity of gray represents the data occurrence density. From left to right, the circular-circular correlation coefficient is  $C = 0.3890, 0.5330, 0.5097, 0.4870$ , and the p-value is  $p = 0.0000, 0.0000, 0.0000, 0.0000$ . That is there is significant linear correction between  $\phi$  and  $\theta$ . The circular regression gives, from left to right,  $\theta = 0.5290\phi - 79^\circ$  for slow predator,  $\theta = 0.4057\phi - 104^\circ$  for mid-speed predator,  $\theta = 0.6537\phi - 122^\circ$  for fast predator, and  $\theta = 0.5513\phi - 105^\circ$  for combined data; regression lines are superimposed in red.

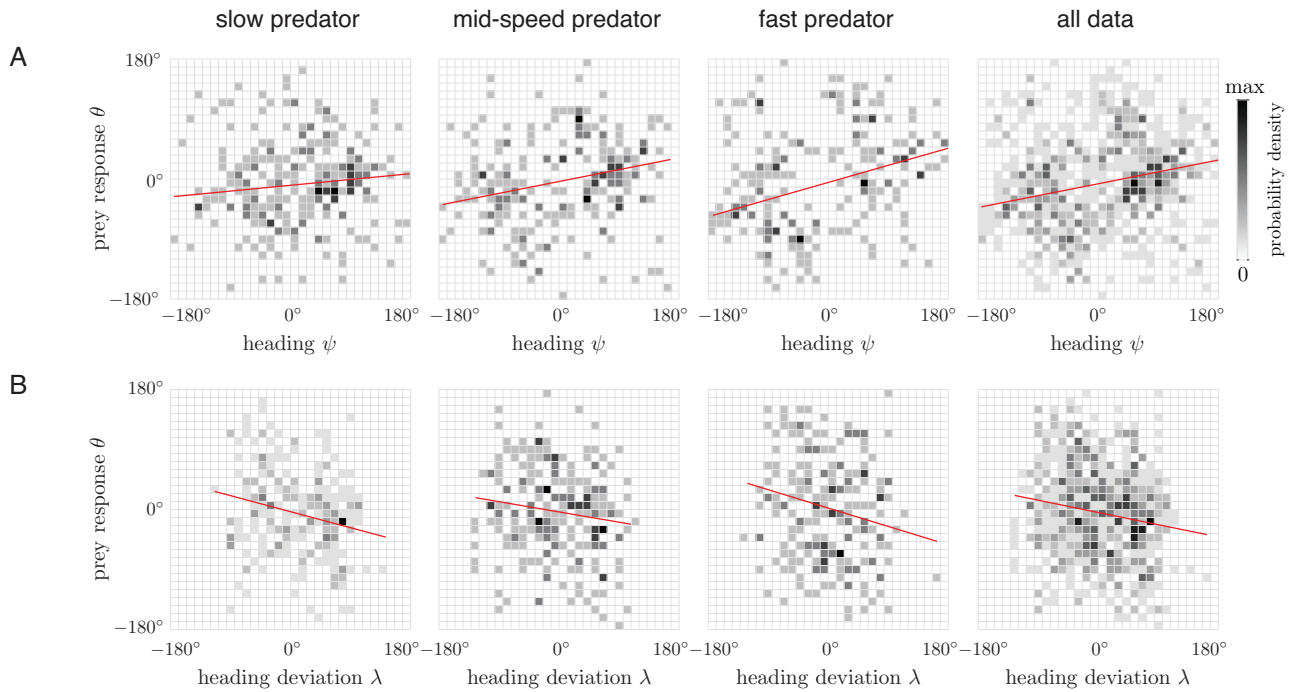

**Fig. S6. Bivariate histograms between predator heading  $\psi$  and prey response  $\theta$  and between predator relative heading  $\lambda$  and prey response  $\theta$ .** (A) From left to right, the circular-circular correlation coefficient is  $C = 0.13429, 0.28031, 0.21852, 0.24764$  and the p-value is  $p = 0.025880, 0.00000, 0.0009, 0.0000$ . There is consistent but not strong positive correlation between  $\psi$  and  $\theta$ . The circular regression gives, from left to right,  $\theta = 0.0967\psi - 9^\circ$  for slow predator,  $\theta = 0.1975\psi - 4^\circ$  for mid-speed predator,  $\theta = 0.2852\psi - 5^\circ$  for fast predator, and  $\theta = 0.1975\psi - 7^\circ$  for combined data; regression lines are superimposed in red. The variance unexplained by linear regression is large. (B) Bivariate histograms between predator heading deviation  $\lambda$  and prey response  $\theta$ . From left to right, the circular-circular correlation coefficient is  $C = -0.2009, -0.1377, -0.0762, -0.1419$ , and the p-value is  $p = 0.0016, 0.0333, 0.2474, 0.0001$ . The circular regression gives, from left to right,  $\theta = -0.2671\lambda - 3^\circ$  for slow predator,  $\theta = 0.1709\lambda - 4^\circ$  for mid-speed predator,  $\theta = -0.3061\lambda + 2^\circ$  for fast predator, and  $\theta = -0.2038\lambda - 4^\circ$  for combined data; regression lines are superimposed in red. That is, there is consistent but weak negative correlation between  $\lambda$  and  $\theta$ . The weak negative correlation is largely due to the relationship  $\lambda = \psi - \phi - \pi$  with predator angular position  $\phi$ .

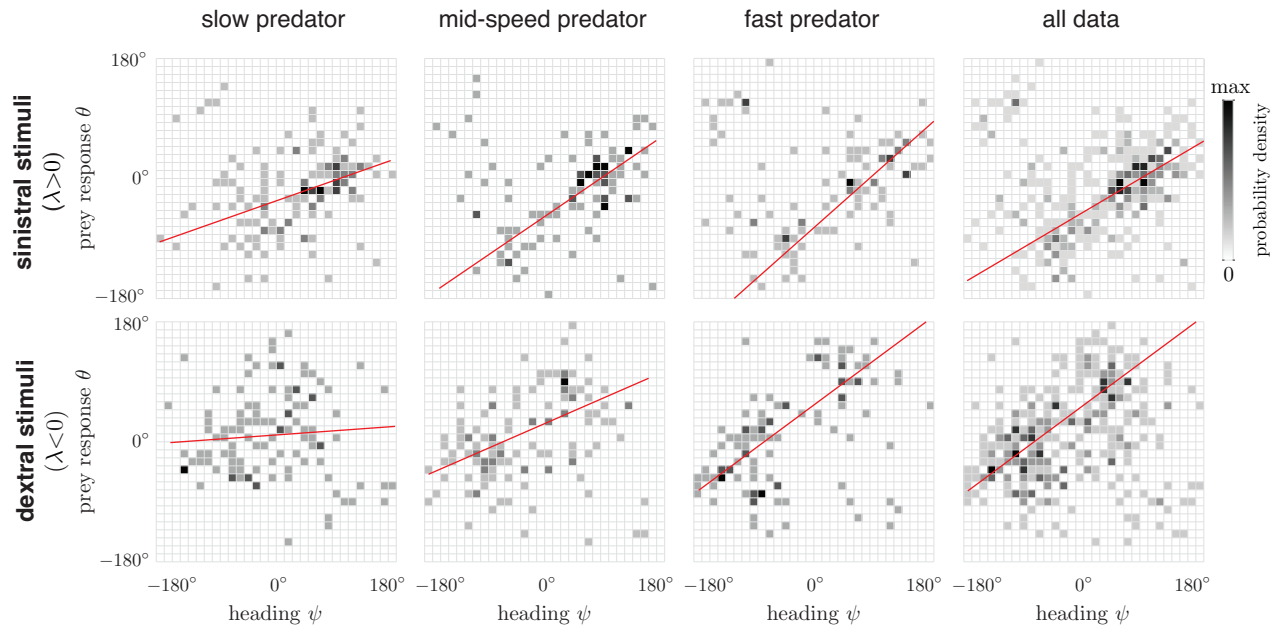

**Fig. S7. Bivariate histograms between predator heading  $\psi$  and prey response  $\theta$  organized based on predator relative heading  $\lambda$ .** Dataset is split based on the sign of relative heading  $\lambda$ : In each case, sinistral stimulus for  $\lambda > 0$  and dextral stimulus for  $\lambda < 0$ , the joint distribution of predator heading  $\psi$  and prey response  $\theta$  is plotted. From left to right, for  $\lambda > 0$ , the circular-circular correlation coefficient is  $C = 0.4147, 0.5626, 0.5731, 0.5129$ , and the p-value is  $p = 0.0000, 0.0000, 0.0000, 0.0000$  for  $\lambda > 0$ ; whereas for  $\lambda < 0$ ,  $C = 0.1959, 0.4857, 0.5377, 0.4537$  and  $p = 0.03423, 0.0000, 0.0000, 0.0000$ . The circular regression gives, for  $\lambda > 0$ ,  $\theta = 0.3520\psi - 34^\circ$  for slow predator,  $\theta = 0.6812\psi - 57^\circ$  for mid-speed predator,  $\theta = 0.8876\psi - 74^\circ$  for fast predator, and  $\theta = 0.5899\psi - 50^\circ$  for combined data, whereas for  $\lambda < 0$ ,  $\theta = 0.0721\psi + 10^\circ$  for slow predator,  $\theta = 0.4361 + 27^\circ$  for mid-speed predator,  $\theta = 0.7406\psi + 55^\circ$  for fast predator, and  $\theta = 0.4970\psi + 32^\circ$  for combined data; regression lines are superimposed in red. Compared to the bivariate histograms in fig. S6(A), in each case, there is more significant correlation between  $\psi$  and  $\theta$ , with the exception of the slow predator dataset when  $\lambda < 0$ .

**A Experimental Data: probabilistic interpretation**

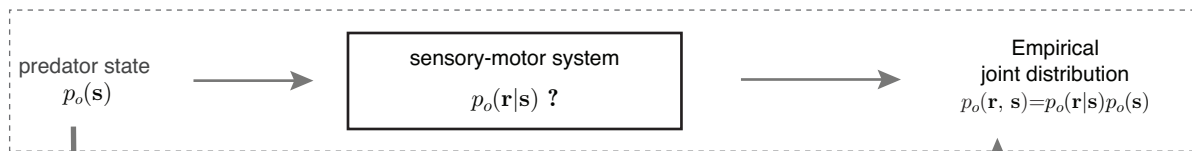

**B Theoretical Evasion Strategies: probabilistic interpretation with no noise**

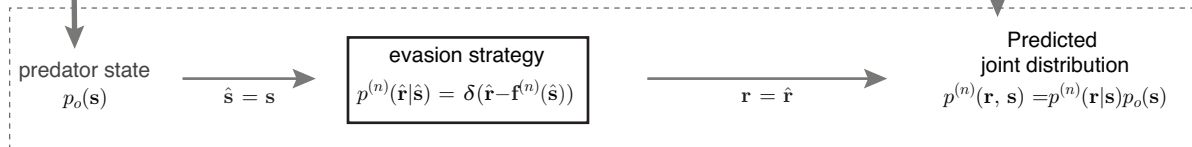

**C Theoretical Evasion Strategies: probabilistic modeling with perception and response noise**

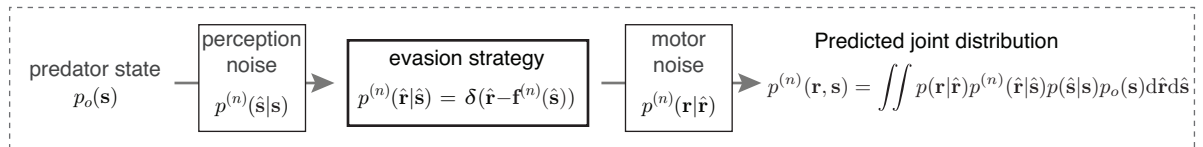

**Fig. S8. Probabilistic interpretation of experimental data and probabilistic formulation of theoretical evasion models** (A) Predator state  $p_o(\mathbf{s})$  and joint distribution  $p_o(\mathbf{s}, \mathbf{r})$  of predator state and prey response at evasion are accessible experimentally, however, the conditional probability  $p_o(\mathbf{r}|\mathbf{s})$  of an evasion response given a predatory stimulus is not readily accessible and remains unknown. (B) Theoretical evasion models  $\mathbf{r}^{(n)} = \mathbf{f}^{(n)}(\mathbf{s})$  that map predatory stimulus  $\mathbf{s}$  into evasion response  $\mathbf{r}$  can be expressed in probabilistic form; the experimentally-observed distribution of predatory stimuli  $p_o(\mathbf{s})$  can be used as input to generate theoretical predictions of the joint distribution  $p^{(n)}(\mathbf{s}, \mathbf{r})$  for each theoretical model  $n$ . (C) Perception and response noise are accounted for in the probabilistic modeling of evasion.

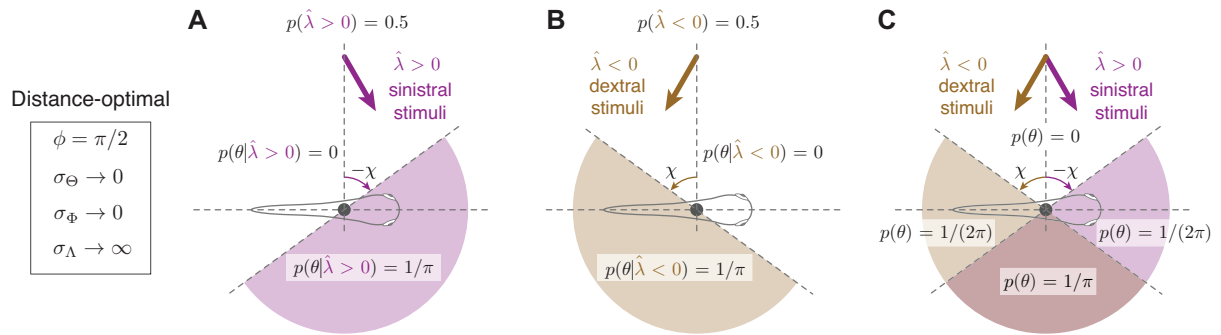

**Fig. S9. Limiting behavior of distance-optimal strategy when predator heading deviation  $\lambda$  is very noisy  $\sigma_{\Lambda} \rightarrow \infty$ .** High level of noise means uniformly random perception of  $\lambda$ , but it alone does not cause random prediction in prey response  $\theta$ . The predicted response is distributed away from the predator based on predator angular position  $\phi$  and parameter  $\chi$ . (A) probability distribution of predicted prey response in the case of sinistral stimuli  $\hat{\lambda} > 0$ . The prediction is equally distributed in the purple half circle. (B) probability distribution of predicted prey response in the case of dextral stimuli  $\hat{\lambda} < 0$ . The prediction is equally distributed in the brown half circle. (C) the overall probability distribution of predicted prey response with large noise in predator heading. The probability distribution density  $p(\theta)$  is calculated by the law of total probability.



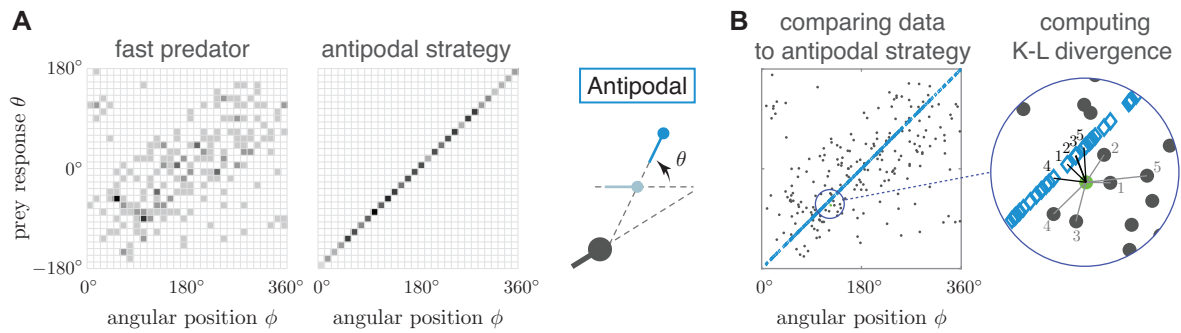

**Fig. S10. K-L divergence estimation method.** (A) Distribution of  $(\phi, \theta)$  based on experimental data from the fast-predator dataset (left) as compared to the predicted distribution of  $(\phi, \theta)$  from the antipodal strategy (right), shown schematically to the far right. (B) Dark gray dots represent the experimental data and blue diamonds represent antipodal model prediction, here superimposed and shown as data points rather than occurrence density as in panel A. On the right is a zoom-in demonstration of the K-L divergence estimate method using  $K = 5$ . From a data point from the experiment (green dot), the nearest five neighbors from the experimental data and from the antipodal strategy prediction are highlighted.

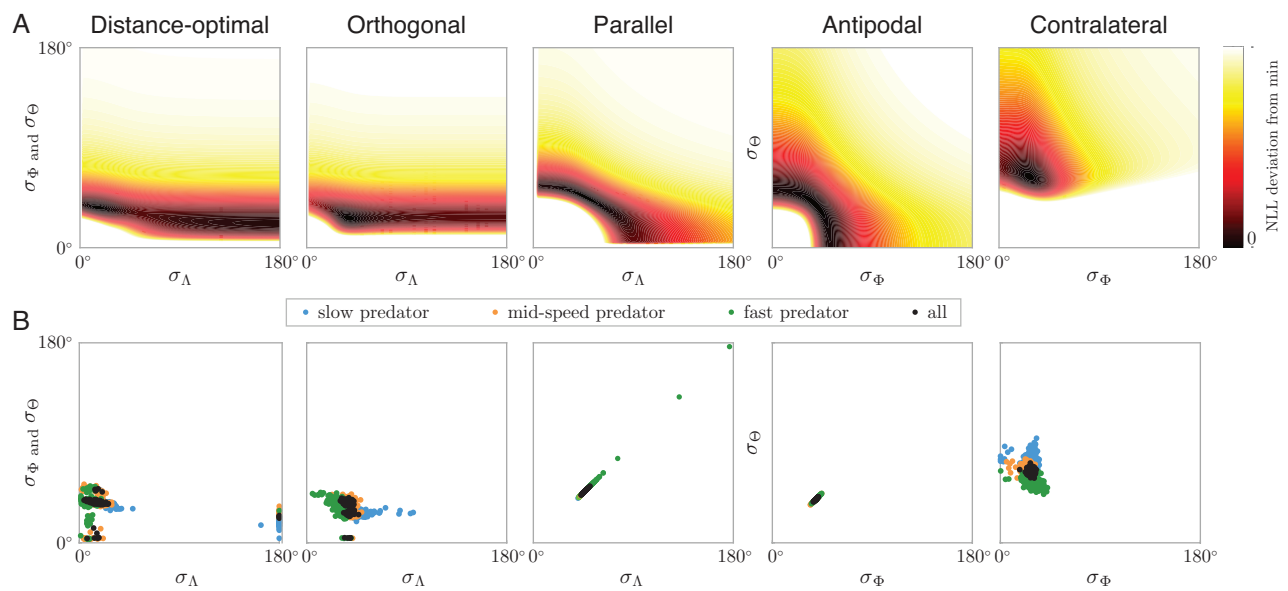

**Fig. S11. Optimization of the noise parameters.** (A) Values of the NLL (negative log-likelihood) over the noise parameter space of each evasion model using all data from all 699 evasion instances. The color indicates the relative NLL compared the minimum NLL. The darkest point gives the optimal noise parameters that best fit the experimental data (lowest NLL values or largest likelihood values). In the first three models, the 3D parameter space is reduced to 2D, by utilizing the mathematical symmetry between  $\sigma_\phi$  and  $\sigma_\theta$ . (B) The optimized noise parameters of all bootstrapping evaluations. Two hundred sets of optimal parameters are plotted using resampled data from each dataset, represented by different colors, per candidate strategy. Each resampled dataset is of the same size as the original dataset.

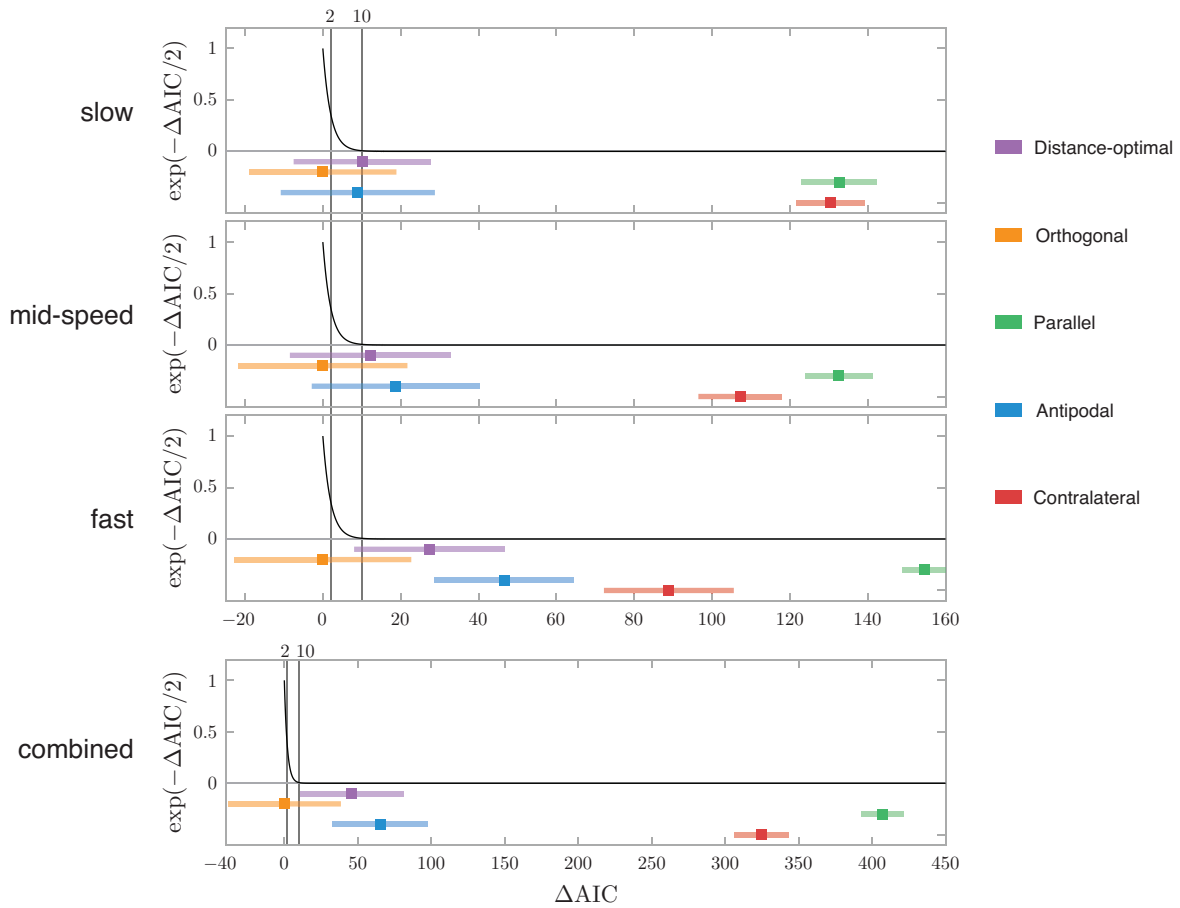

**Fig. S12. Interpretation of AIC differences.** The quantity  $\exp(-\Delta AIC/2)$  (black lines) can be interpreted as the relative likelihood, or the probability that the model minimizes information loss relative to the best-ranking model. The mean values and the range of one standard deviation of AICs for the noisy strategy models (same as Fig.4B of the main text) are highlighted along the horizontal axis. The two empirical thresholds  $\Delta AIC = 2$  and  $\Delta AIC = 10$  are marked by gray vertical lines. Compared to the orthogonal strategy, the probability that other models minimize information loss is almost nil. Considering the distribution of AICs, the distance-optimal strategy and the antipodal strategy overlap with the orthogonal strategy within one standard deviation, except for antipodal strategy in fast predator dataset. In all datasets, the parallel and contralateral strategies are consistently further away from the range of one standard deviation of the orthogonal strategy.

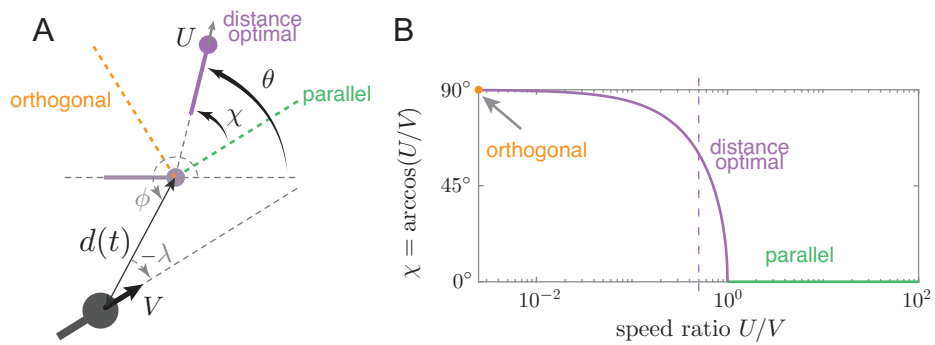

**Fig. S13. Comparison between distance-optimal, orthogonal and parallel strategies.** (A) The distance-optimal strategy by Weihs and Webb (10) maximizes the minimum distance between the predator and the prey during the evasion. The angle  $\chi$  is determined by the speed ratio between the prey and the predator  $U/V$ . In the orthogonal strategy, the prey always heads at  $90^\circ$  angle away from the predator's heading direction. In the parallel strategy, the prey moves in the same direction as the predator. (B) The relationship between  $\chi$  and the speed ratio  $U/V$ . The distance-optimal strategy converges to the orthogonal strategy  $\chi = 90^\circ$  when  $U/V \rightarrow 0$  (fast predator) and to the parallel strategy  $\chi = 0^\circ$  when  $U/V \geq 1$  (slow predator).

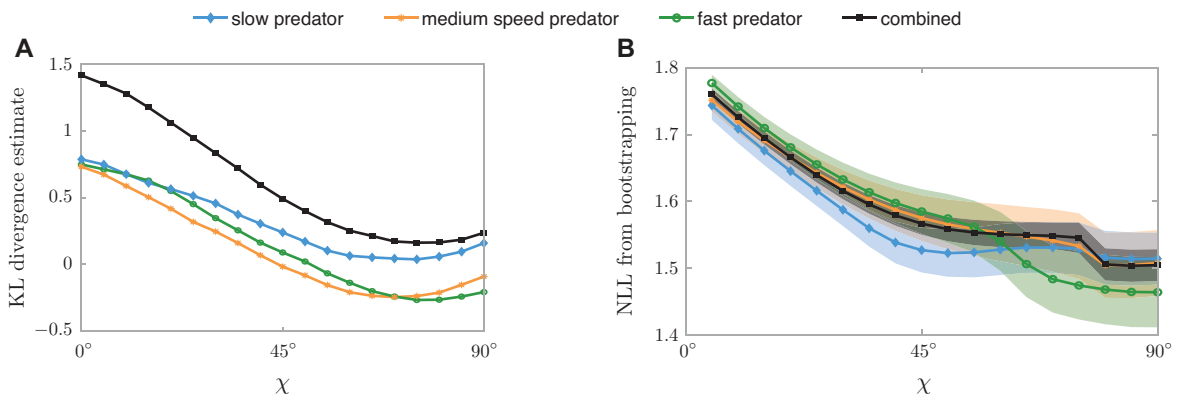

**Fig. S14. Evaluation of distance-optimal strategy as a function of  $\chi = \cos^{-1}(U/V)$ .** The distance-optimal strategy uses the speed ratio  $U/V$  as a parameter. (A) The K-L divergence estimate for the distance-optimal strategy compared to experimental data, using  $k = 5$ . We vary the value of  $\chi$  from  $0^\circ$  to  $90^\circ$  for each dataset. (B) The average NLLs for the distance-optimal strategy as a function of  $\chi$ . Again, we vary the value of  $\chi$  from  $0^\circ$  to  $90^\circ$  and computed the mean and standard deviation for each  $\chi$  and each dataset using bootstrapping, where we randomly drew the same number of samples with repetition from the actual experimental data. In every evaluation, all noise parameters are optimized within the range  $(0, \pi)$  (the same process as in fig. S11) to get the lowest possible NLL value.

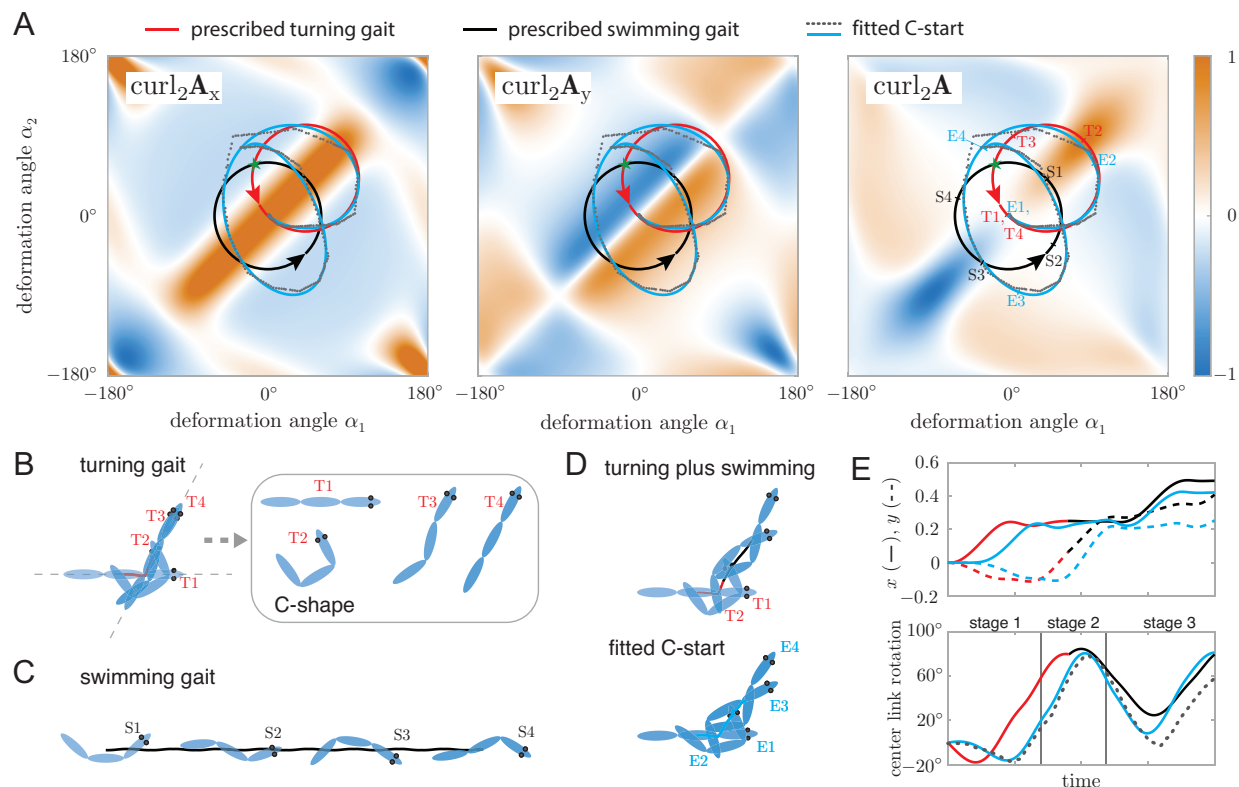

**Fig. S15. Simulation of C-start response with the three-link fish model.** (A) The scalar fields formed from the geometric mechanics analysis. The magnitude has been normalized to be within the range of  $[-1, 1]$ . The net motion of the three-link fish from following a closed trajectory on the plane can be inferred from the color enclosed by the trajectory. Examples of trajectories that produce swimming gait and turning gait are given by the black and the red circles, respectively. The grey dots show the trajectory of a C-start response extracted from experiment. This trajectory is then fitted by third-order Fourier series, shown in light blue. (B) Snapshots of the turning gait following the red circular trajectory in A for multiple times. The corresponding locations on the deformation trajectory are marked by numbers 1,2,3,4 in red. (C) Snapshots of the swimming gait following the black circular trajectory in A for multiple times. The corresponding locations on the deformation trajectory for the four snapshots are marked by numbers 1,2,3,4 in black. Snapshots of the turning plus swimming by following the red circle first and then joining the black circle at the green star, alongside the snapshots of the C-start motion by following the light blue trajectory in A. (E) (above) The net displacement  $(x, y)$  of three-link fish generated from the prescribed turning-plus-swimming motion and from the fitted C-start motion (D). (below) The rotation in the center link generated from the prescribed turning-plus-swimming motion, from the fitted C-start motion, and the rotation measured from experiment (26).

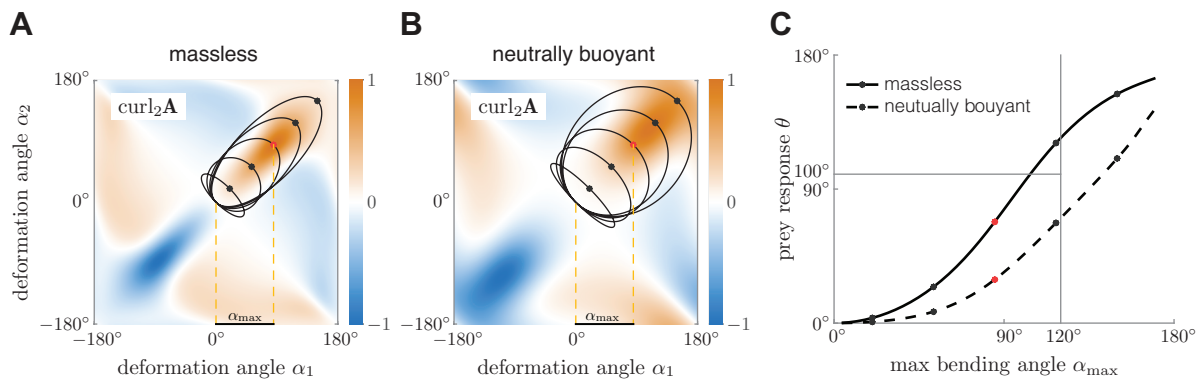

**Fig. S16. Predicting prey response from its bending angle.** A family of elliptic trajectories are parameterized by the max bending angle  $\alpha_{\max}$ . The other axis length is selected by maximizing the turn angle achieved in one cycle. (A) A few representative trajectories are shown for the massless three-link fish model. The black and red dots mark the point where the fish curls to a 'C' shape and where the max bending angle  $\alpha_{\max}$  is defined. The distance between the two dashed lines gives  $\alpha_{\max}$  for the trajectory marked by the red dot. (B) Representative trajectories with same max bending angles for the neutrally buoyant three-link fish model. (C) The constructed mapping from max bending angle  $\alpha_{\max}$  to prey response  $\theta$  for models with different mass parameters. The head and tail of fish model start crossing each other when  $\alpha_{\max}$  exceeds  $120^\circ$ , where the predicted prey response reaches around  $100^\circ$  depending on the mass parameter.

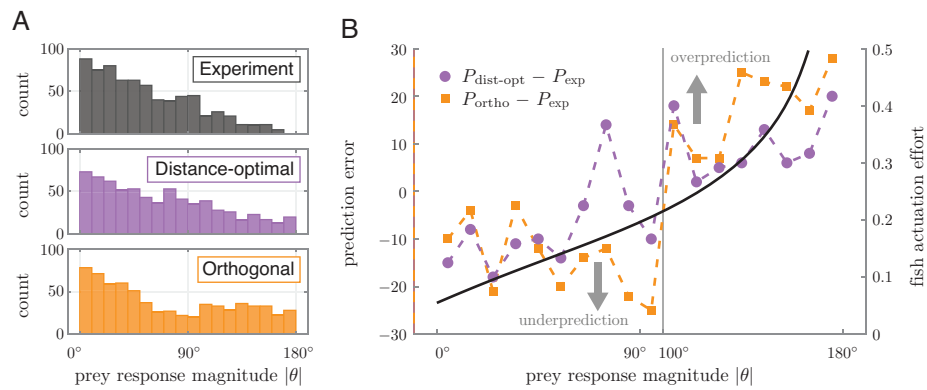

**Fig. S17. Comparison between model predictions and experiment measurements of prey response magnitude  $|\theta|$ .** (A) The histogram of  $|\theta|$  from experiment dataset, distance-optimal strategy and orthogonal strategy. (B) The colored markers with dotted lines show the difference in the frequency of prey response  $\theta$  predicted by distance-optimal and orthogonal strategies compared to the experiment data. Both errors change from negative to positive as response angle  $\theta$  increases above 100 degrees. Here prey responses from all datasets are shown together with no distinction. The black solid line shows the actuation effort required to turn a certain angle computed from the 3-link fish model, which exhibits the same trend as the prediction errors.



**Table S2. Results from statistical analysis of experimental data**

| Univariate analysis                  |               |          |                    |          |               |          |          |          |
|--------------------------------------|---------------|----------|--------------------|----------|---------------|----------|----------|----------|
| Variable                             | Slow predator |          | Mid-speed predator |          | Fast predator |          | Combined |          |
|                                      | mean          | std      | mean               | std      | mean          | std      | mean     | std      |
| reactive distance $d$                | 0.02434       | 0.00934  | 0.02685            | 0.01232  | 0.02470       | 0.01115  | 0.02529  | 0.01100  |
| predator angular position $\phi$     | 4.4742°       | 62.3731° | 3.2134°            | 64.7275° | 1.8999°       | 73.9732° | 5.0989°  | 67.2255° |
| predator heading $\psi$              | 5.2485°       | 64.1633° | 4.4574°            | 71.5149° | 0.17955°      | 75.8059° | 0.76637° | 71.1338° |
| predator heading deviation $\lambda$ | 0.43071°      | 51.7531° | 4.663°             | 52.333°  | 0.83638°      | 48.5776° | 4.3195°  | 51.2418° |
| prey response $\theta$               | 4.8889°       | 54.1421° | 3.1013°            | 56.9645V | 5.3878°       | 65.2675° | 0.31316° | 58.7074° |

\* The mean and the std above refer to circular mean and circular standard deviation for all variables except reactive distance  $d$ .

| Bivariate analysis between predator state and prey response $\theta$ |               |            |             |                    |            |             |               |            |             |             |            |             |
|----------------------------------------------------------------------|---------------|------------|-------------|--------------------|------------|-------------|---------------|------------|-------------|-------------|------------|-------------|
| Predator state                                                       | Slow predator |            |             | Mid-speed predator |            |             | Fast predator |            |             | Combined    |            |             |
|                                                                      | Correlation   |            | LR<br>slope | Correlation        |            | LR<br>slope | Correlation   |            | LR<br>slope | Correlation |            | LR<br>slope |
|                                                                      | coef. $C$     | $p$ -value |             | coef. $C$          | $p$ -value |             | coef. $C$     | $p$ -value |             | coef. $C$   | $p$ -value |             |
| reactive distance $d$                                                | 0.0481        | 0.7481     |             | 0.0903             | 0.3864     |             | 0.0701        | 0.5901     |             | 0.0697      | 0.1827     |             |
| angular position $\phi$                                              | 0.3890        | 0.0000     | 0.406       | 0.5330             | 0.0000     | 0.529       | 0.5097        | 0.0000     | 0.654       | 0.4870      | 0.0000     | 0.551       |
| heading $\psi$                                                       | 0.1343        | 0.0259     | 0.097       | 0.2803             | 0.0000     | 0.198       | 0.2185        | 0.0009     | 0.285       | 0.2476      | 0.0000     | 0.198       |
| heading deviation $\lambda$                                          | -0.2009       | 0.0016     | -0.267      | -0.1377            | 0.0333     | -0.171      | -0.0762       | 0.2474     | -0.306      | -0.1419     | 0.0001     | -0.204      |
| heading $\psi  _{\lambda > 0}$                                       | 0.4147        | 0.0000     | 0.352       | 0.5626             | 0.0000     | 0.681       | 0.5731        | 0.0000     | 0.888       | 0.5129      | 0.0000     | 0.590       |
| heading $\psi  _{\lambda < 0}$                                       | 0.1959        | 0.03423    | 0.072       | 0.4857             | 0.0000     | 0.436       | 0.5377        | 0.0000     | 0.741       | 0.4537      | 0.0000     | 0.497       |

\* The correlation above refers to circular-linear correlation between  $d$  and  $\theta$  and circular-circular correlation for the other rows.

\* The LR slope above denotes the slope coefficient of the linear regression between two circular variables.
